# Supplementary material for: Herpotriquinones A and B, two dimeric naphthoquinone–epoxycyclohexenone adducts with anti-neuroinflammatory activity from the isopod-associated fungus Herpotrichia sp. SF09
Source: Royal Society of Chemistry journal article supplement (doi:10.1039/d4qo01256a), 2024-01-01
Supplement: d4qo01256a1.pdf [file d4qo01256a1.pdf]

## Supporting Information

### Herpotriquinones A and B, Two Dimeric Naphthoquinone-Epoxycyclohexenone Adducts with Anti-Neuroinflammatory Activity from the Isopod-Associated Fungus *Herpotrichia* sp. SF09

Yi-Jie Zhai <sup>a,d,#</sup>, Zhen-Zhen Zhou<sup>b,#</sup>, Wen-Ji Wang<sup>a</sup>, Xin-Yu Wang<sup>a</sup>, Zi-Jue Wang<sup>a</sup>, Guang-Zhi Dai<sup>c</sup>, Xinxiang Lei<sup>c</sup>, Wen-Li Li <sup>a,d</sup>, Jin-Ming Gao<sup>a,\*</sup>, and Wen-Bo Han<sup>a,\*</sup>

<sup>a</sup>*Shaanxi Key Laboratory of Natural Products & Chemical Biology, College of Chemistry and Pharmacy, Northwest A&F University, Yangling, Shaanxi 712100, People's Republic of China*

<sup>b</sup>*Provincial Key Laboratory of Agrobiolgy and Institute of Germplasm Resources and Biotechnology, Jiangsu Academy of Agricultural Sciences, Nanjing, Jiangsu 210014, People's Republic of China*

<sup>c</sup>*State Key Laboratory of Applied Organic Chemistry, Lanzhou Magnetic Resonance Center, College of Chemistry and Chemical Engineering, Lanzhou University, Lanzhou 730000, People's Republic of China*

<sup>d</sup>*College of Plant Protection, Northwest A&F University, Yangling, Shaanxi 712100, People's Republic of China*

<sup>e</sup>*Helmholtz International Lab for Anti-infectives, Shandong University-Helmholtz Institute of Biotechnology, State Key Laboratory of Microbial Technology, Shandong University, Qingdao, Shandong 266237, People's Republic of China*

|                                                     |   |
|-----------------------------------------------------|---|
| <b>Experimental Section</b> .....                   | 4 |
| Preparation of acetone derivative of <b>1</b> ..... | 4 |

|                                                                                                                                                                                                                                                                                 |    |
|---------------------------------------------------------------------------------------------------------------------------------------------------------------------------------------------------------------------------------------------------------------------------------|----|
| Computational details.....                                                                                                                                                                                                                                                      | 4  |
| <b>Figure S1.</b> (A) HPLC-UV chromatogram of CH <sub>2</sub> Cl <sub>2</sub> /MeOH (v/v = 100:8) fraction from <i>Herpotrichia</i> sp. extract; (B) UV spectrum for a compound at R <sub>t</sub> 13.34 min; (C) HRESIMS spectrum for the peak at R <sub>t</sub> 13.34 min..... | 6  |
| <b>Figure S2.</b> Linear regression analysis between the exptl. and calcd. <sup>13</sup> C and <sup>1</sup> H NMR data of <b>2</b> .....                                                                                                                                        | 6  |
| <b>Figure S3.</b> The schematic reaction mechanisms and free energy profiles of the reaction pathways from <b>10</b> and <b>13</b> to <b>14</b> through intermediate <b>I</b> and <b>IV</b> .....                                                                               | 7  |
| <b>Figure S4.</b> The raw images for all Western blotting .....                                                                                                                                                                                                                 | 7  |
| <b>Figure S5.</b> <sup>1</sup> H NMR spectrum of herpotriquinone A ( <b>1</b> ) in CDCl <sub>3</sub> (500 MHz). .....                                                                                                                                                           | 8  |
| <b>Figure S6.</b> <sup>13</sup> C NMR spectrum of herpotriquinone A ( <b>1</b> ) in CDCl <sub>3</sub> (125 MHz).....                                                                                                                                                            | 9  |
| <b>Figure S7.</b> HMQC spectrum of herpotriquinone A ( <b>1</b> ) in CDCl <sub>3</sub> .....                                                                                                                                                                                    | 10 |
| <b>Figure S8.</b> <sup>1</sup> H- <sup>1</sup> H COSY spectrum of herpotriquinone A ( <b>1</b> ) in CDCl <sub>3</sub> .....                                                                                                                                                     | 11 |
| <b>Figure S9.</b> HMBC spectrum of herpotriquinone A ( <b>1</b> ) in CDCl <sub>3</sub> .....                                                                                                                                                                                    | 12 |
| <b>Figure S10.</b> NOESY spectrum of herpotriquinone A ( <b>1</b> ) in CDCl <sub>3</sub> .....                                                                                                                                                                                  | 13 |
| <b>Figure S11.</b> UV spectrum of herpotriquinone A ( <b>1</b> ) in methanol .....                                                                                                                                                                                              | 14 |
| <b>Figure S12.</b> IR spectrum of herpotriquinone A ( <b>1</b> ) .....                                                                                                                                                                                                          | 15 |
| <b>Figure S13.</b> HRESIMS spectrum of herpotriquinone A ( <b>1</b> ).....                                                                                                                                                                                                      | 16 |
| <b>Figure S14.</b> <sup>1</sup> H NMR spectrum of herpotriquinone B ( <b>2</b> ) in acetone- <i>d</i> <sub>6</sub> (500 MHz). .                                                                                                                                                 | 17 |
| <b>Figure S15.</b> <sup>13</sup> C NMR spectrum of herpotriquinone B ( <b>2</b> ) in acetone- <i>d</i> <sub>6</sub> (125 MHz). 18                                                                                                                                               | 18 |
| <b>Figure S16.</b> HMQC spectrum of herpotriquinone B ( <b>2</b> ) in acetone- <i>d</i> <sub>6</sub> . .....                                                                                                                                                                    | 19 |
| <b>Figure S17.</b> <sup>1</sup> H- <sup>1</sup> H COSY spectrum of herpotriquinone B ( <b>2</b> ) in acetone- <i>d</i> <sub>6</sub> .....                                                                                                                                       | 20 |
| <b>Figure S18.</b> HMBC spectrum of herpotriquinone B ( <b>2</b> ) in acetone- <i>d</i> <sub>6</sub> .....                                                                                                                                                                      | 21 |
| <b>Figure S19.</b> NOESY spectrum of herpotriquinone B ( <b>2</b> ) in acetone- <i>d</i> <sub>6</sub> .....                                                                                                                                                                     | 22 |
| <b>Figure S20.</b> UV spectrum of herpotriquinone B ( <b>2</b> ) in methanol.....                                                                                                                                                                                               | 23 |
| <b>Figure S21.</b> IR spectrum of herpotriquinone B ( <b>2</b> ) .....                                                                                                                                                                                                          | 24 |
| <b>Figure S22.</b> HRESIMS spectrum of herpotriquinone B ( <b>2</b> ) .....                                                                                                                                                                                                     | 25 |
| <b>Figure S23.</b> <sup>1</sup> H NMR spectrum of RKB 3564S ( <b>5</b> ) in CDCl <sub>3</sub> (400 MHz). .....                                                                                                                                                                  | 26 |
| <b>Figure S24.</b> <sup>1</sup> H NMR spectrum of epoxy cyclohexenone ( <b>8</b> ) in CDCl <sub>3</sub> (500 MHz)....                                                                                                                                                           | 27 |
| <b>Table S1.</b> <sup>1</sup> H, <sup>13</sup> C, NOESY and HMBC NMR data for <b>1</b> in acetone- <i>d</i> <sub>6</sub> .....                                                                                                                                                  | 28 |
| <b>Table S2.</b> <sup>1</sup> H, <sup>13</sup> C, NOESY and HMBC NMR data for <b>2</b> in CDCl <sub>3</sub> .....                                                                                                                                                               | 29 |
| <b>Table S3.</b> Experimental and calculated <sup>13</sup> C NMR chemical shifts of <b>2</b> .....                                                                                                                                                                              | 29 |
| <b>Table S4.</b> Experimental and calculated <sup>1</sup> H NMR chemical shifts of <b>2</b> .....                                                                                                                                                                               | 30 |
| <b>Table S5.</b> Comparison of key parameters of <b>2</b> in NMR computation .....                                                                                                                                                                                              | 30 |

|                                                                                                                                                                                                           |    |
|-----------------------------------------------------------------------------------------------------------------------------------------------------------------------------------------------------------|----|
| <b>Table S6.</b> Primer sequences of genes .....                                                                                                                                                          | 30 |
| <b>Table S7.</b> Anti-neuroinflammatory activity of <b>1</b> and <b>2</b> .....                                                                                                                           | 31 |
| <b>Table S8.</b> Conformational analysis of the B3LYP/6-31G(d) optimized conformers of <b>2</b> in the gas phase (T=298.15K) .....                                                                        | 31 |
| <b>Table S9~S10.</b> Atomic coordinates (Å) of <b>2</b> obtained at the B3LYP/6-31G(d) level of theory in the gas phase .....                                                                             | 31 |
| <b>Table S11~S12.</b> Key transitions, oscillator strengths, and rotatory strengths in the ECD spectrum of conformer <b>2</b> at PBE1PBE/6-311G(d) level of theory in MeOH with IEFPCM solvent model..... | 32 |
| <b>Table S13.</b> Gibbs free energies of the species in the processes from <b>VI</b> and <b>IV</b> to <b>XI</b> through intermediates <b>Xa</b> to <b>Xd</b> .....                                        | 36 |
| <b>Reference</b> .....                                                                                                                                                                                    | 51 |

## Experimental Section

### Preparation of acetonide derivative of **1**

Compound **1** (8.0 mg) in dry acetone (2.0 mL) was treated with 2,2-dimethoxypropane (DMP) (100  $\mu$ L) and catalytic amount pyridinium *p*-toluenesulfonate (PPTS) (1.0 mg) at room temperature then heated at 50  $^{\circ}$ C overnight. The solvent was evaporated under vacuum, the residue was purified by a silica gel chromatographic column (PE/EtOAc=2:1) to obtain the product as a yellow oil and crystallized in acetone/ EtOAc (v/v=1:1) as a red crystal; HR-ESI-MS:  $m/z$  537.1728 [M + Na]<sup>+</sup> (calcd. for C<sub>27</sub>H<sub>30</sub>O<sub>10</sub>Na, 537.1731).

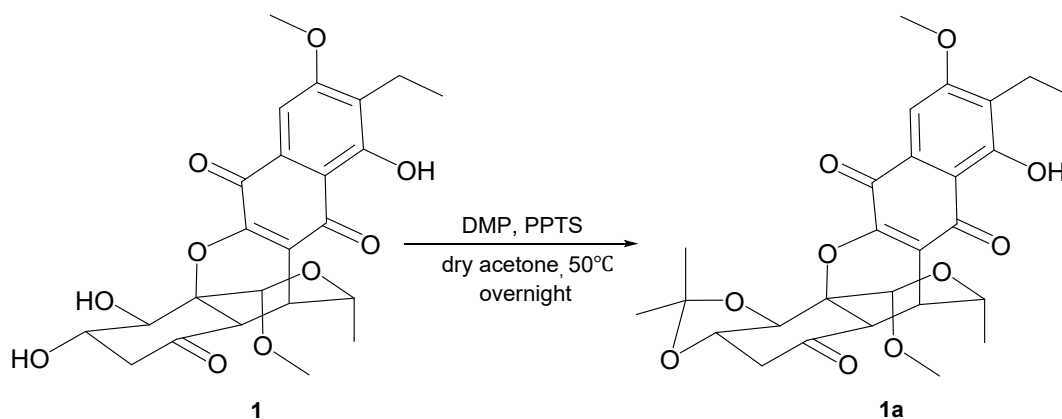

### Computational details

The conformer rotamer ensemble sampling tool (crest)<sup>2,3</sup> was utilized to generate candidate conformers and DFT calculations were performed using the Gaussian 16 program.<sup>4</sup> The conformers within an energy window of 10 kcal/mol were optimized at B3LYP/6-31G(d) level of theory with Grimme's D3 dispersion correction ("EmpiricalDispersion=GD3" key words in input files). Frequency analysis of all optimized conformations was undertaken at the same level of theory to ensure they were true local minima on the potential energy surface. Then, energies of all optimized conformations were evaluated by M062X/6-311+G(2d,p) with D3 dispersion correction. Gibbs free energies of each conformers were calculated by adding "Thermal correction to Gibbs Free Energy" obtained by frequency analysis to electronic energies obtained at M062X/6-311+G(2d,p). Room-temperature (298.15 K) equilibrium

populations were calculated according to Boltzmann distribution law. Those conformers accounting for over 2% population were subjected to subsequent calculations.

NMR shielding constants were calculated with the GIAO method at mPW1PW91-SCRF/6-31+G(d,p) level with IEFPCM solvent model in acetone solvent. The shielding constants obtained were converted into chemical shifts by referencing to TMS at 0 ppm ( $\delta_{\text{cal}} = \sigma_{\text{TMS}} - \sigma_{\text{cal}}$ ), where the  $\sigma_{\text{TMS}}$  was the shielding constant of TMS calculated at the same level.<sup>5</sup> The DP4+ probabilities of each possible candidate were calculated with the EXCEL spreadsheet provided by Sarotti *et al.*<sup>6</sup> For each possible candidate, the parameters  $a$  and  $b$  of the linear regression  $\delta_{\text{cal}} = a\delta_{\text{exp}} + b$ ; the correlation coefficient,  $R^2$ ; the mean absolute error (MAE) defined as  $\sum_n |\delta_{\text{cal}} - \delta_{\text{exp}}|/n$ ; the corrected mean absolute error, CMAE, defined as  $\sum_n |\delta_{\text{corr}} - \delta_{\text{exp}}|/n$ , where  $\delta_{\text{corr}} = (\delta_{\text{cal}} - b)/a$ , were calculated.

Time-dependent density-functional theory (TDDFT) ECD calculations were run at PBE1PBE/6-311G(d) level of theory in MeOH with IEFPCM solvent model, respectively. For each conformer, 36 excited states were calculated.<sup>7</sup> The calculated ECD curves were generated using Multiwfn 3.6 software.<sup>8</sup>

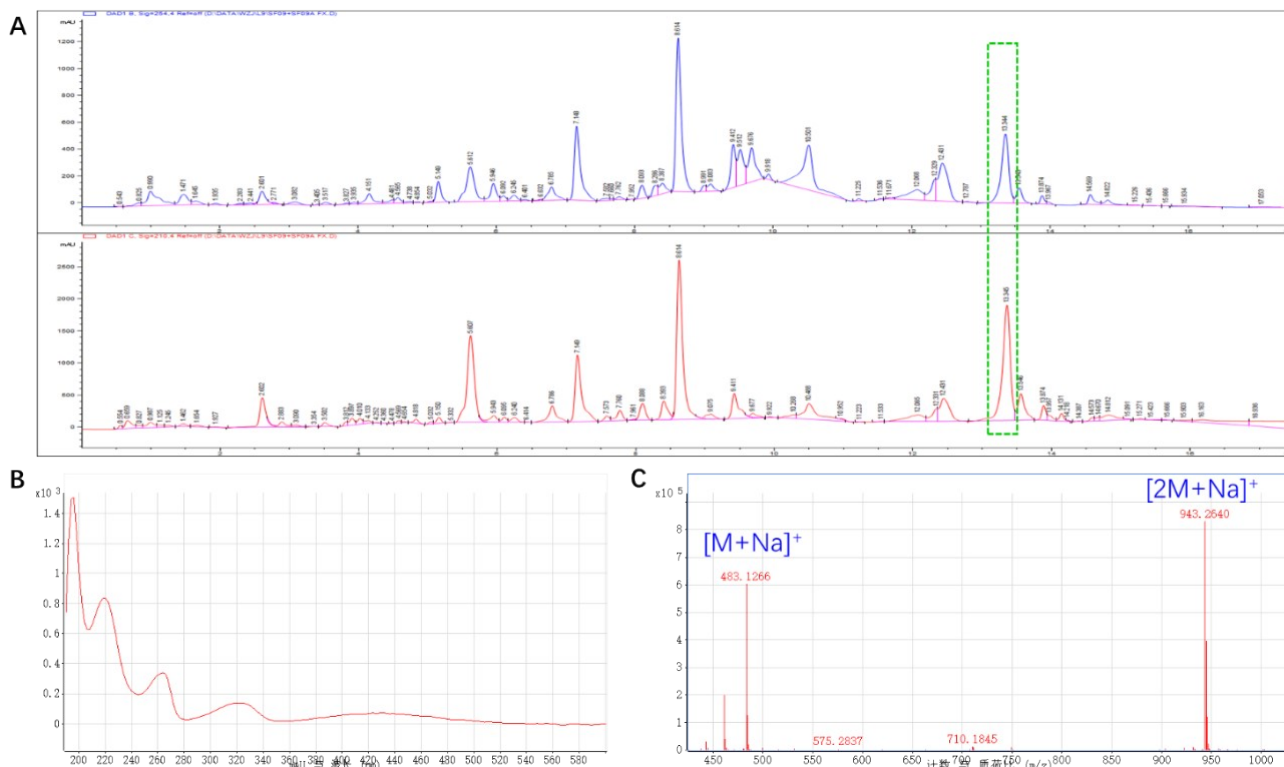

**Figure S1.** (A) HPLC-UV chromatogram of  $CH_2Cl_2/MeOH$  (v/v = 100:8) fraction from *Herpotrichia* sp. extract; (B) UV spectrum for a compound at  $R_t$  13.34 min; (C) HRESIMS spectrum for the peak at  $R_t$  13.34 min.

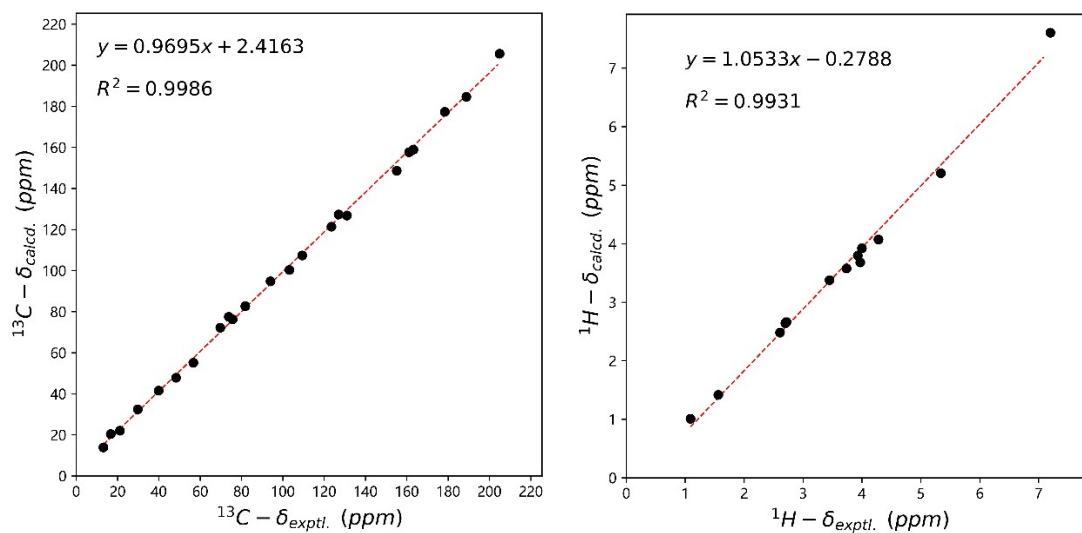

**Figure S2.** Linear regression analysis between the exptl. and calcd.  $^{13}C$  and  $^1H$  NMR data of **2**.

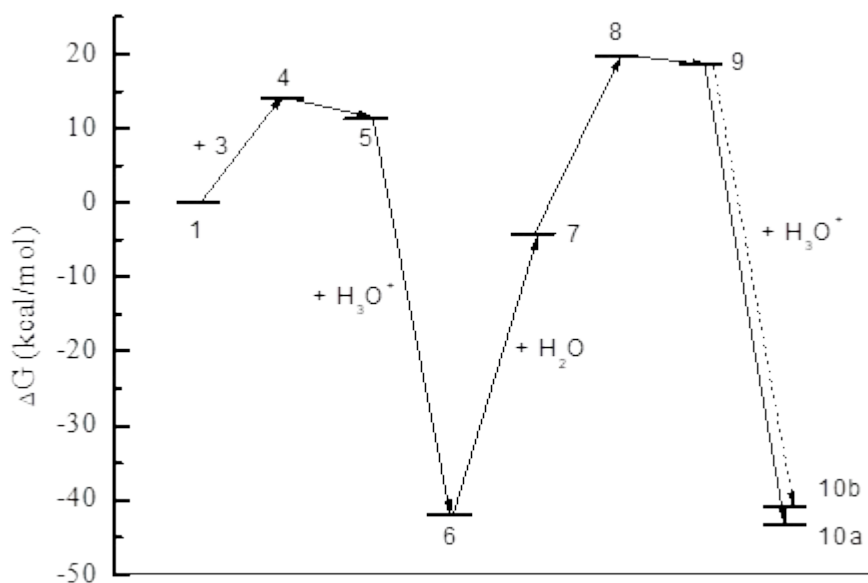

**Figure S3.** The schematic reaction mechanisms and free energy profiles of the reaction pathways from **VI** and **IX** to **XI** through intermediate **Xa** and **Xd**. The Gibbs Free Energies of the optimized structures were obtained from the thermal correction to Gibbs Free Energy in frequency analysis and the single point energy. Solvation effect was incorporated in single-point energy calculations using the PCM model with water as the solvent.

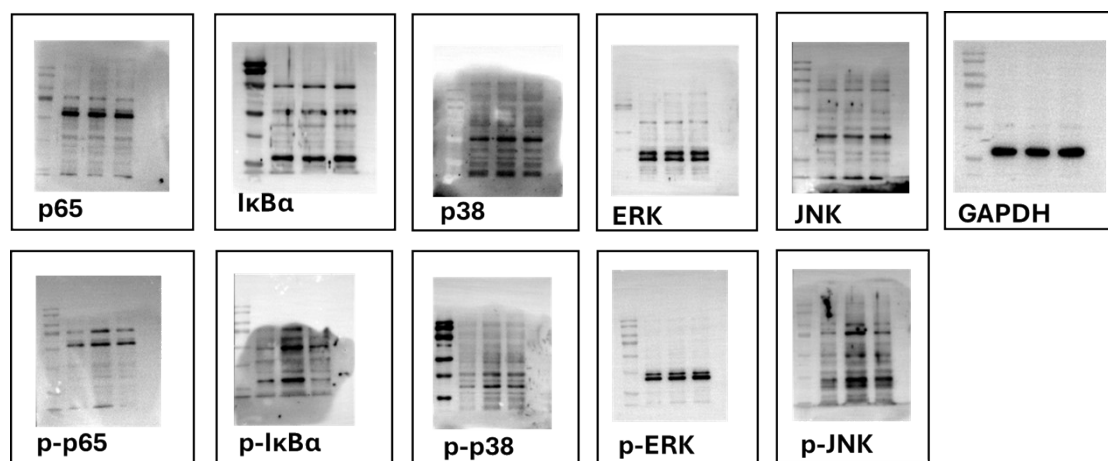

**Figure S4.** The raw images for all Western blotting.

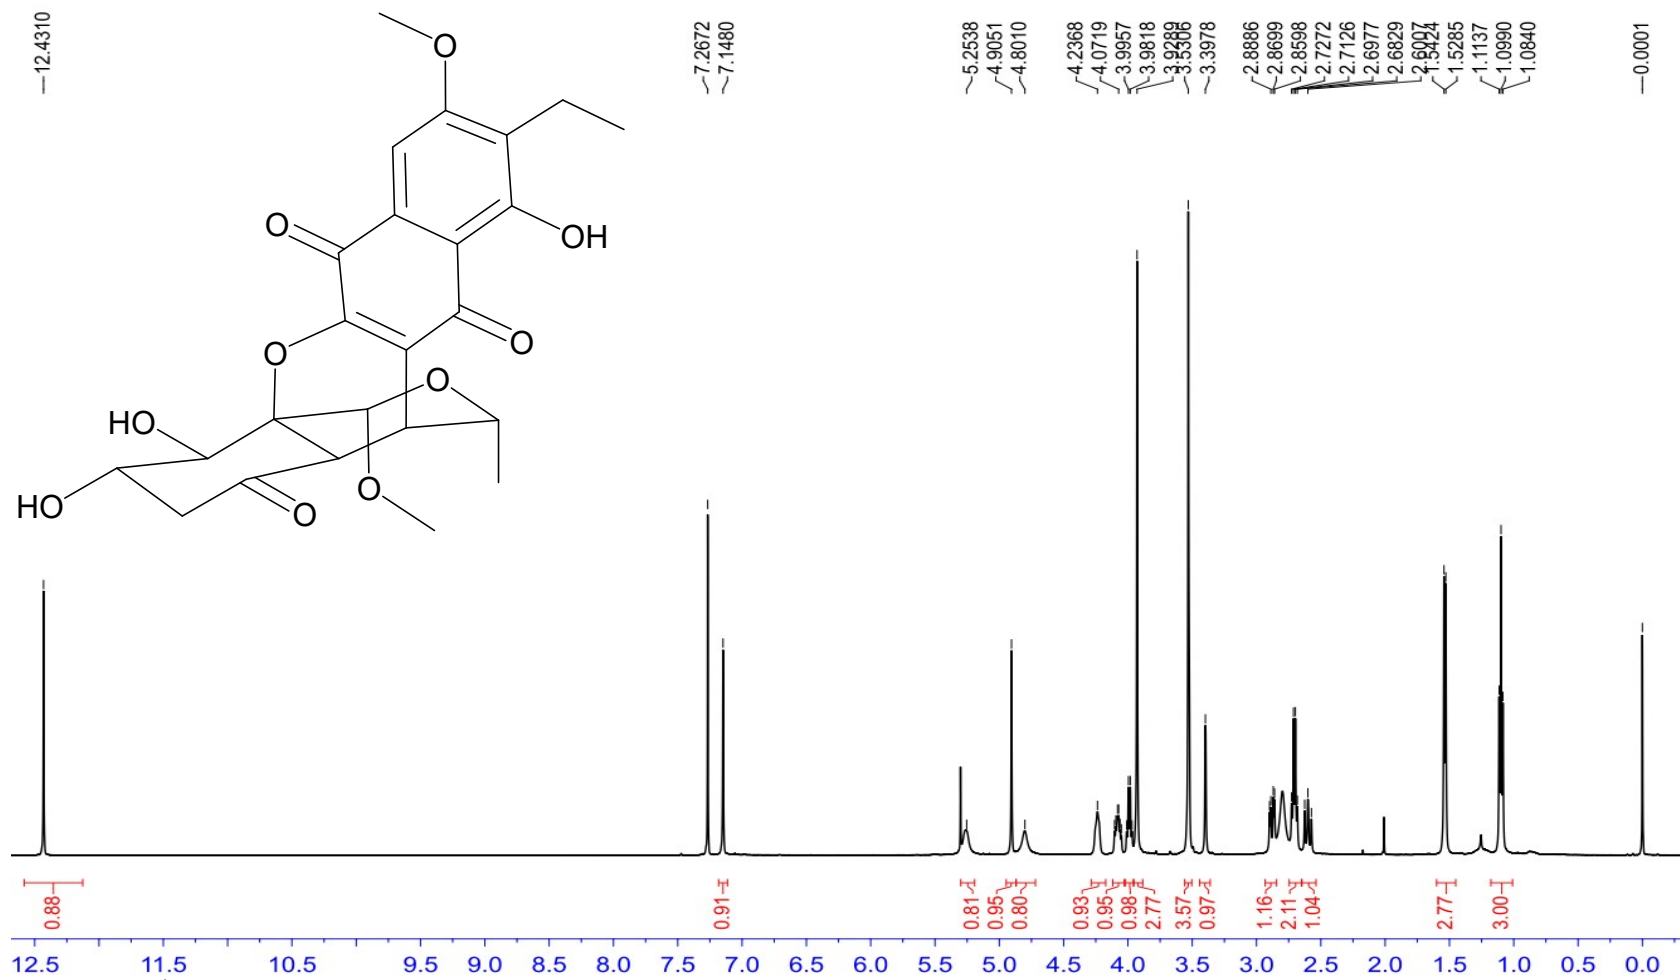

**Figure S5.** <sup>1</sup>H NMR spectrum of herpotriquinone A (**1**) in CDCl<sub>3</sub> (500 MHz).



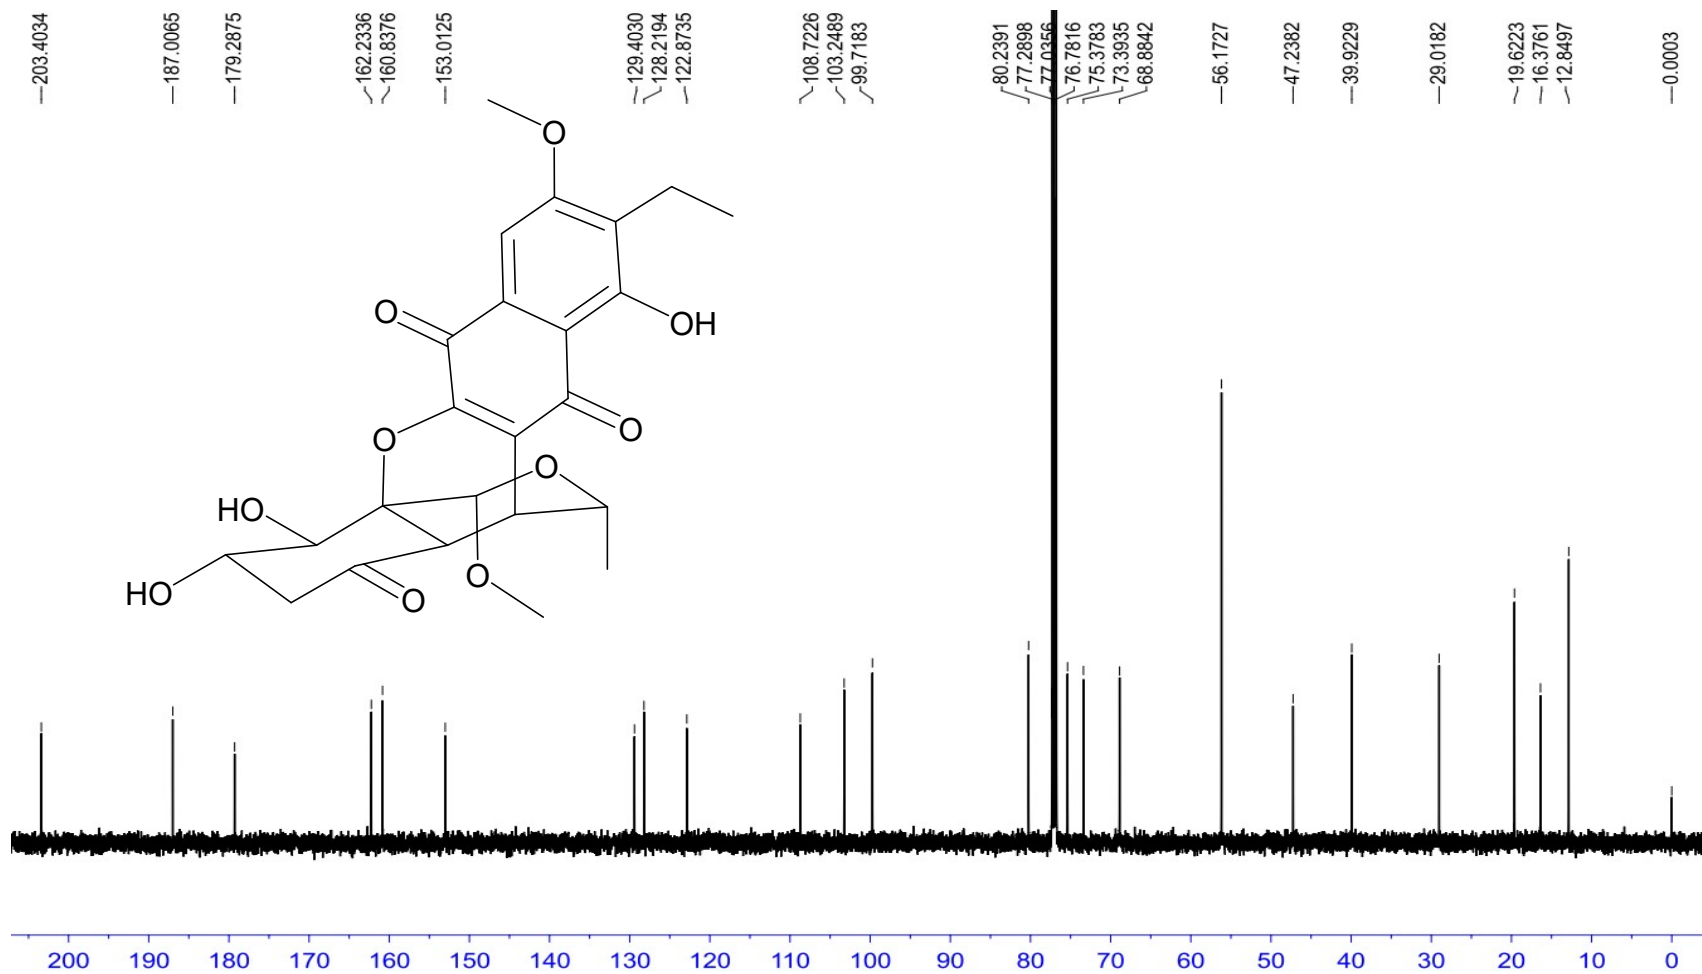

Figure S6.  $^{13}\text{C}$  NMR spectrum of herpotriquinone A (**1**) in  $\text{CDCl}_3$  (125 MHz).

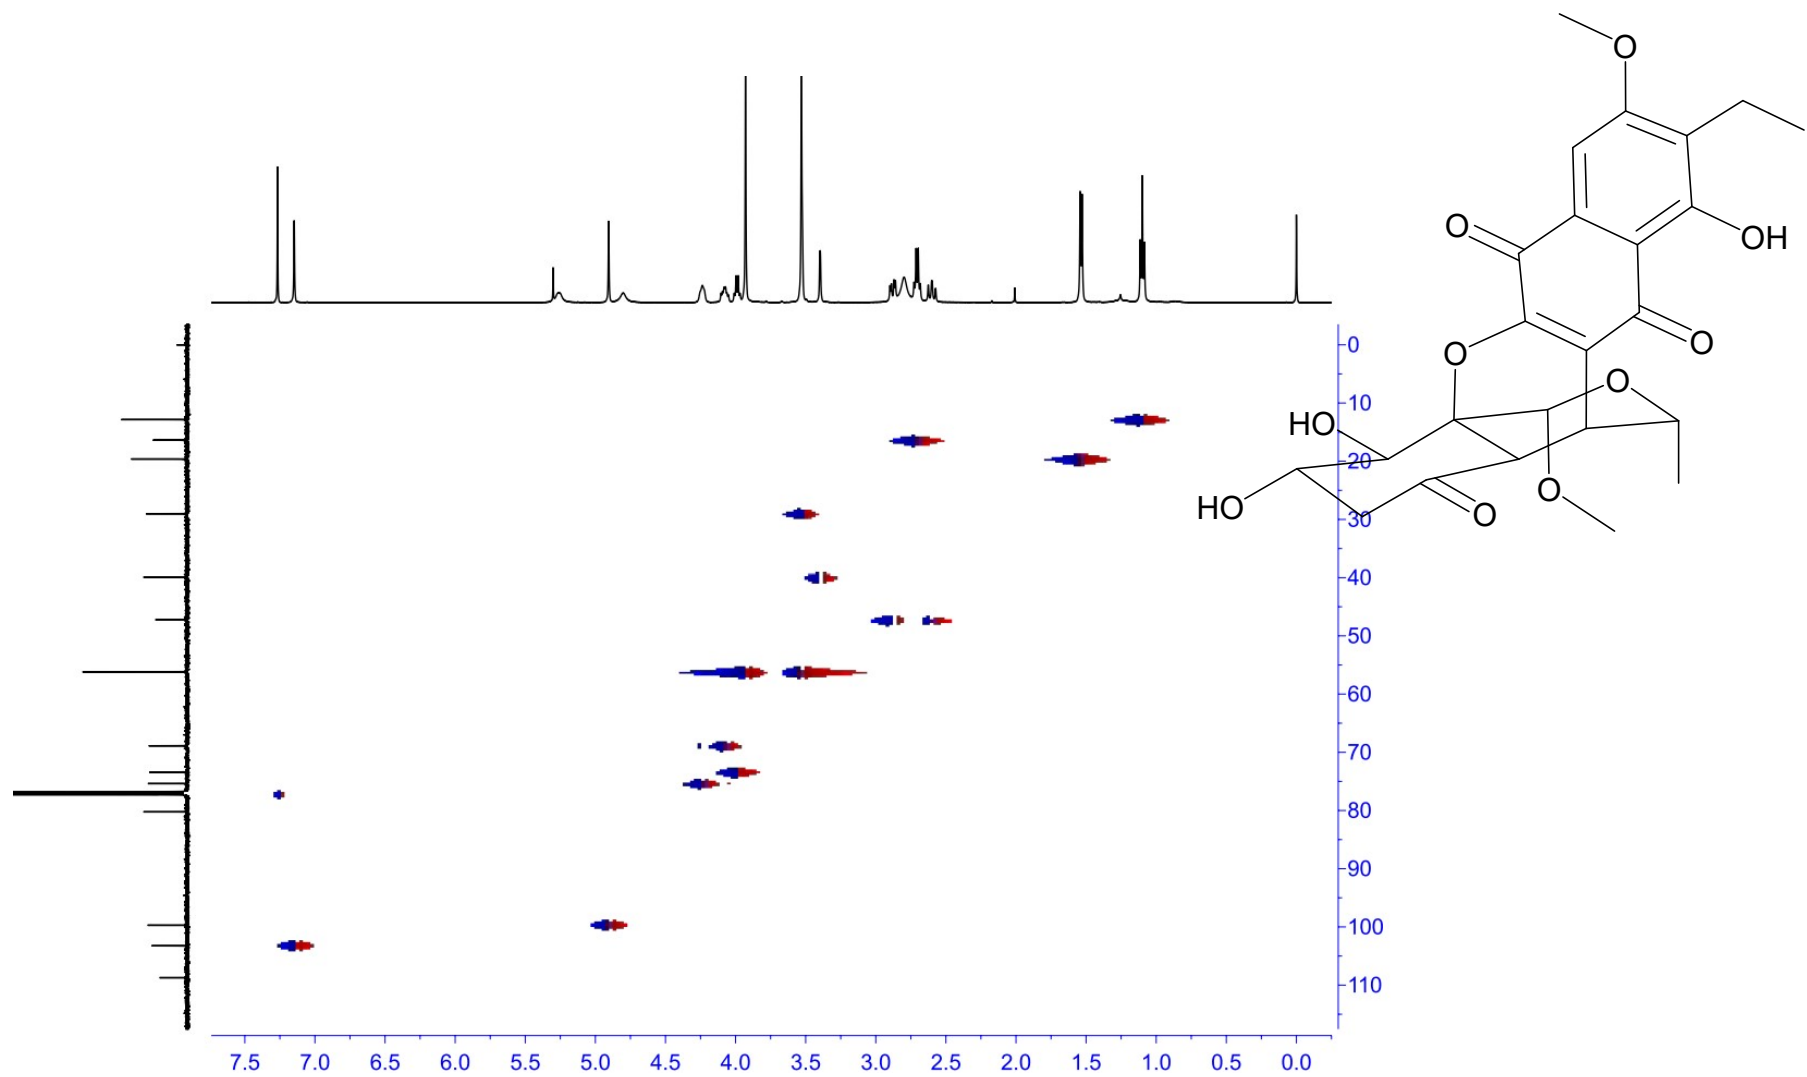

**Figure S7.** HMBC spectrum of herpotriquinone A (**1**) in CDCl<sub>3</sub>.

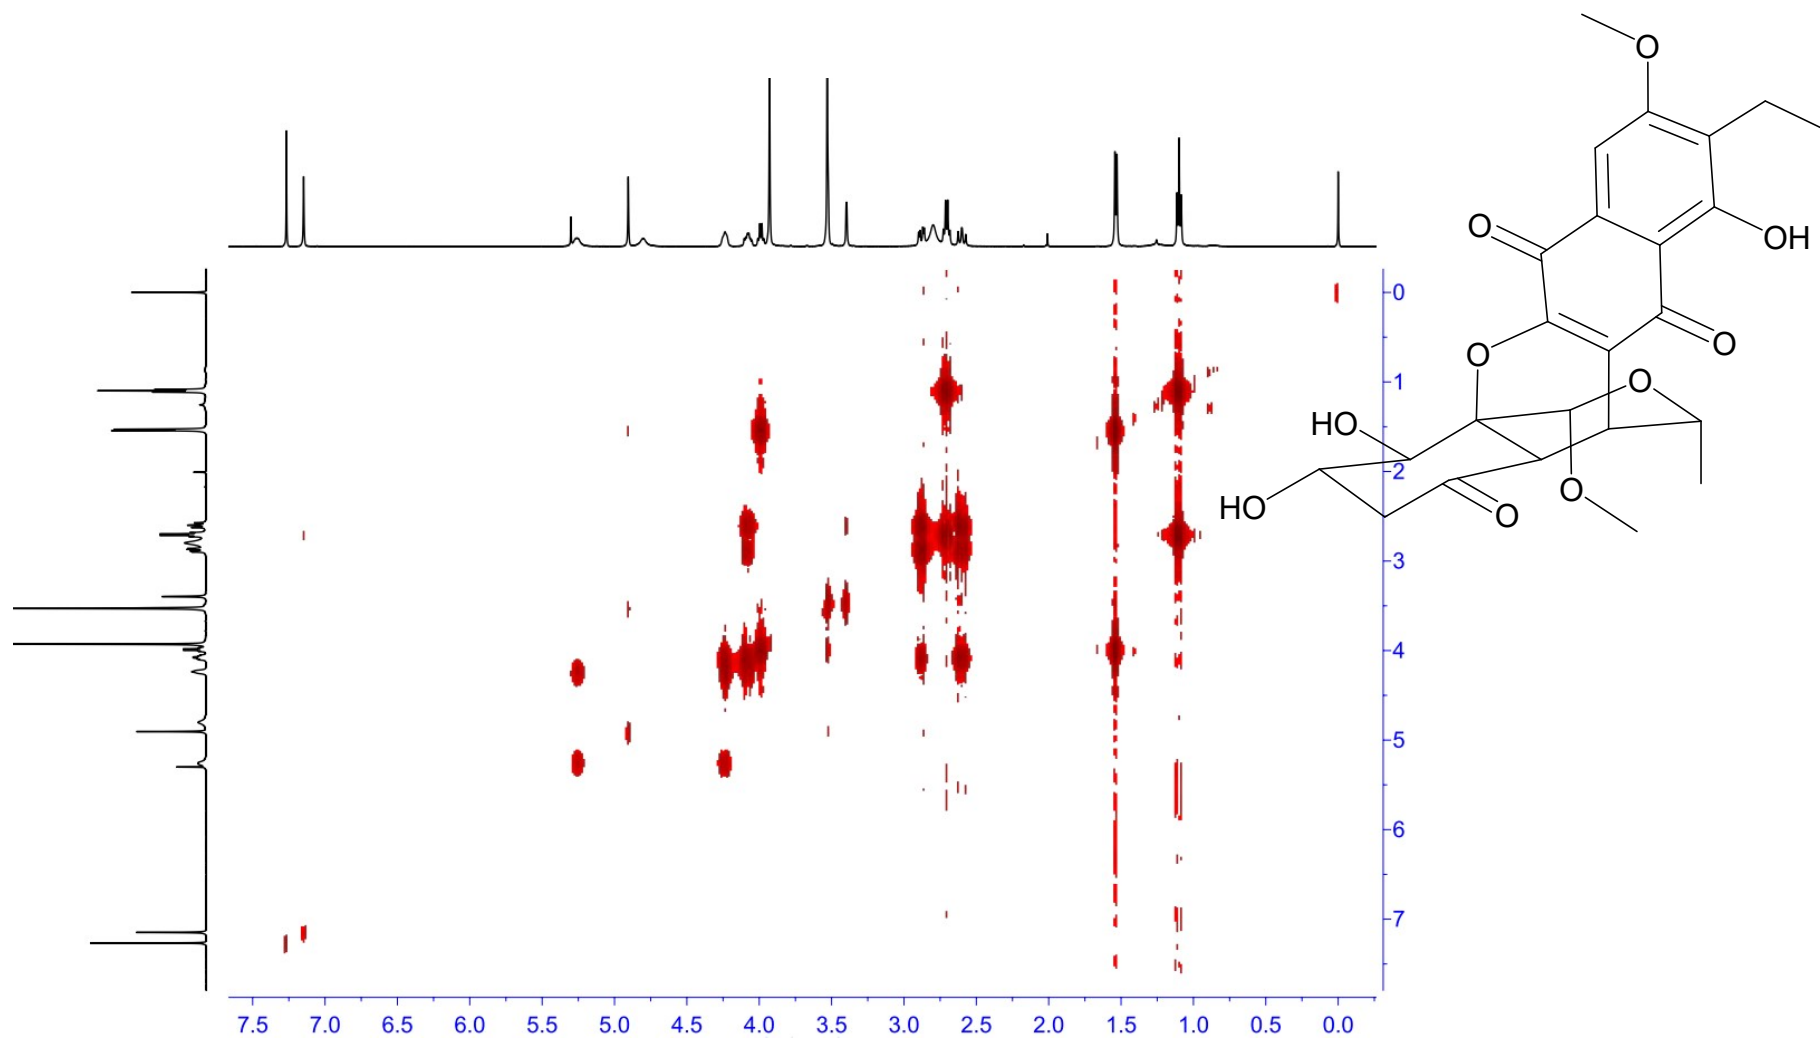

**Figure S8.**  $^1\text{H}$ - $^1\text{H}$  COSY spectrum of herpotriquinone A (**1**) in  $\text{CDCl}_3$ .



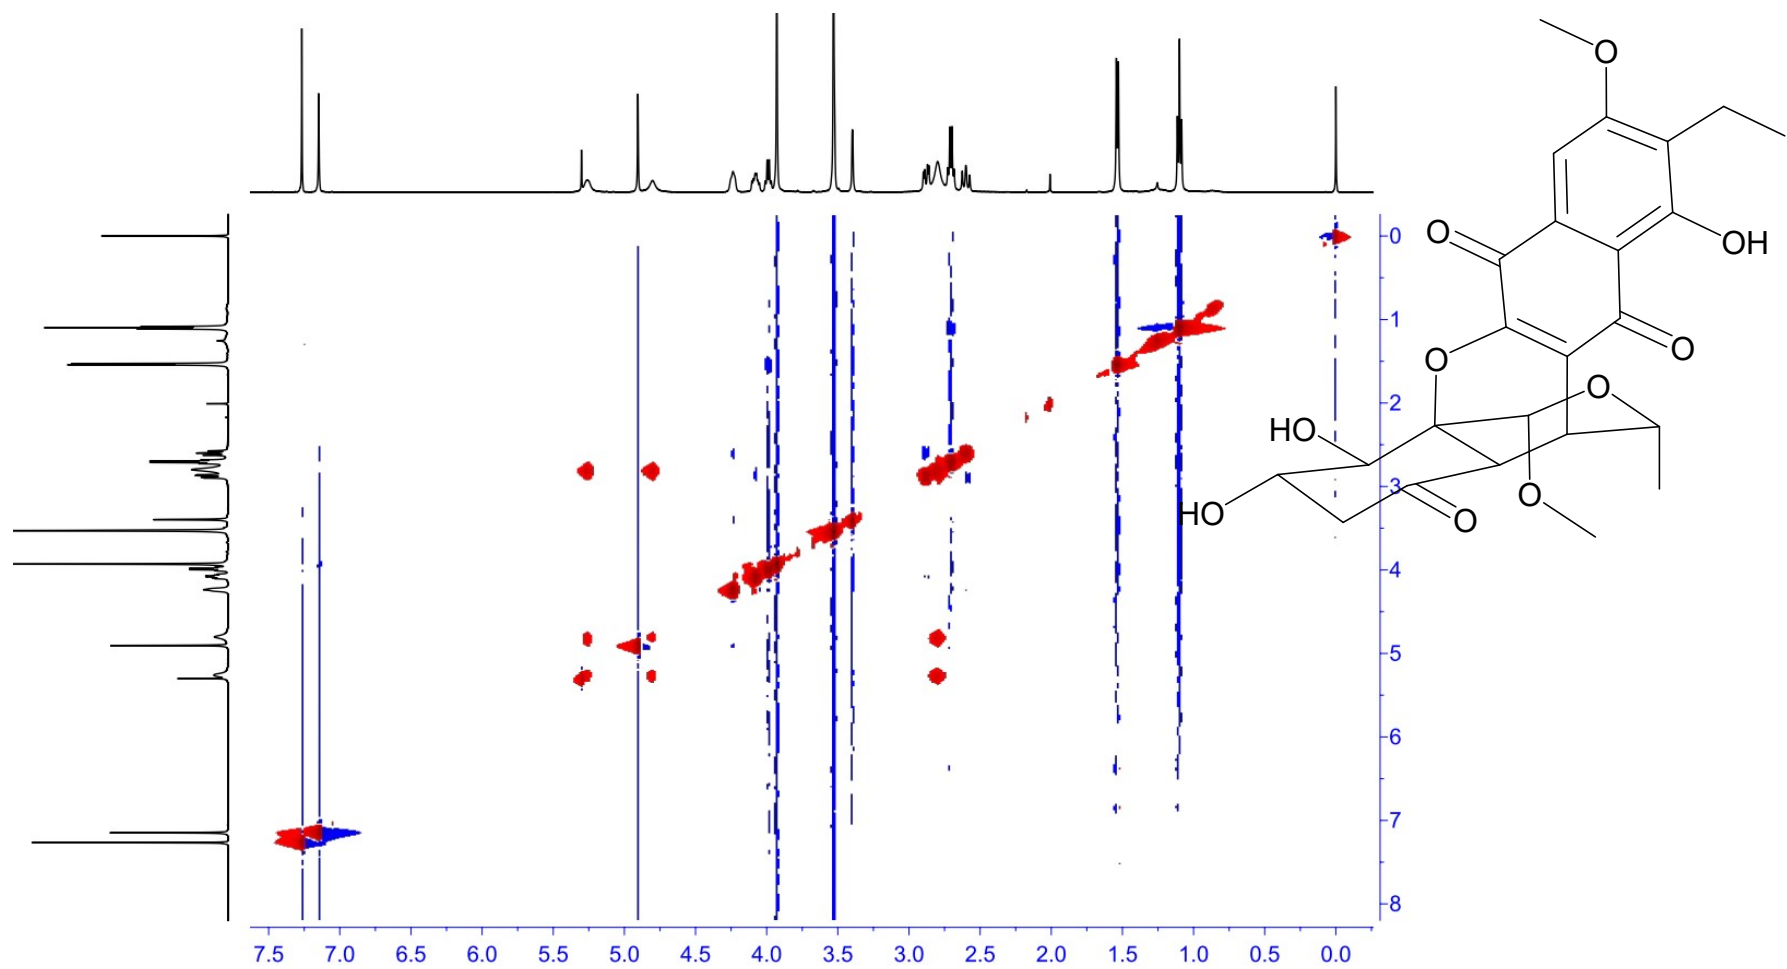

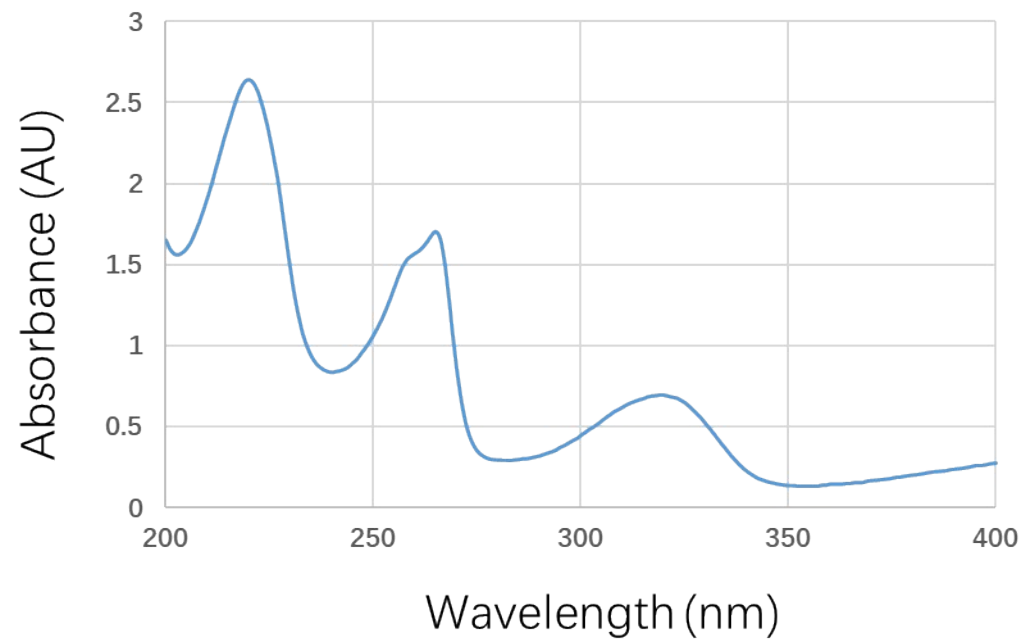

**Figure S11.** UV spectrum of herpotriquinone A (**1**) in methanol.

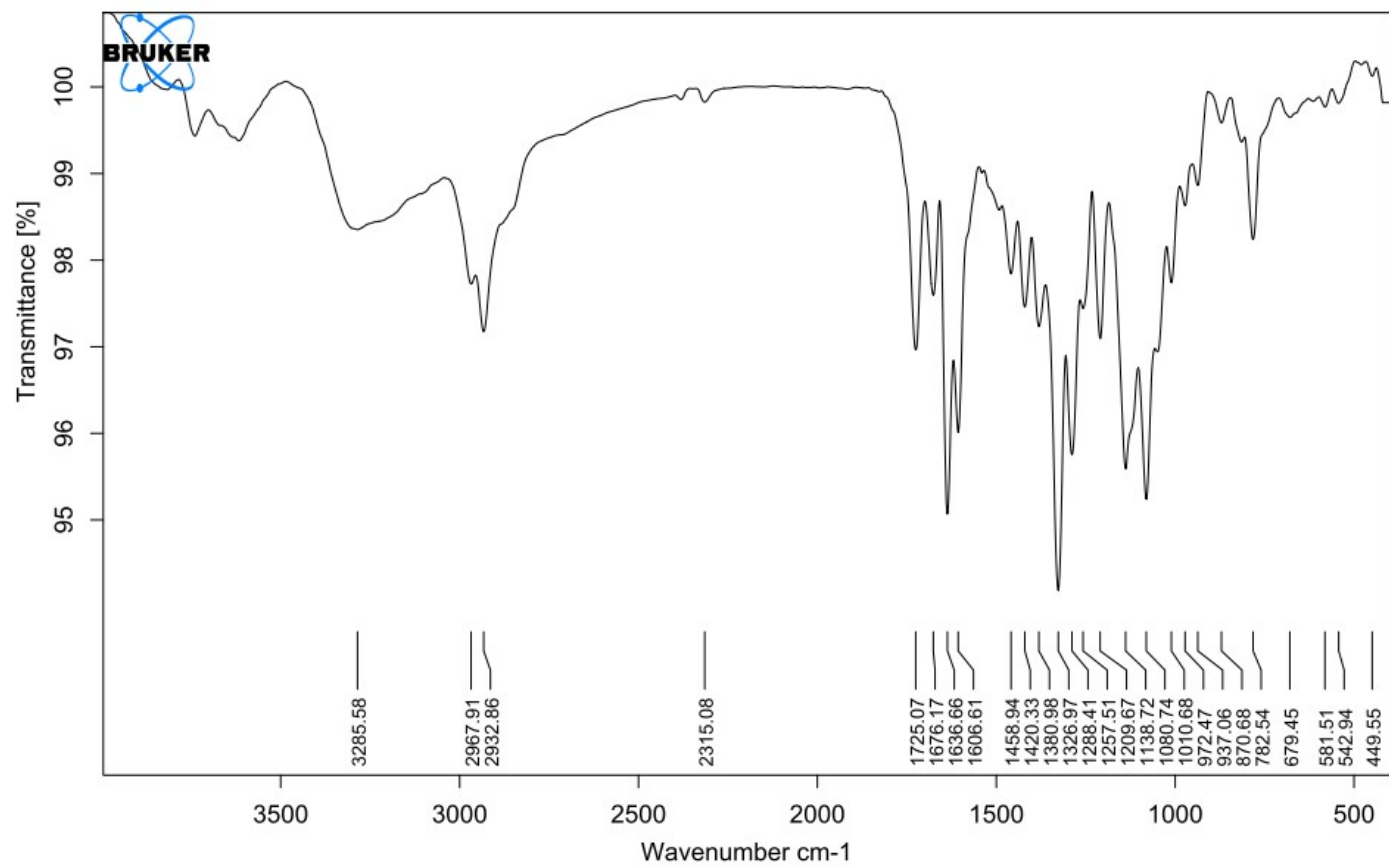

Figure S12. IR spectrum of herpotriquinone A (1).

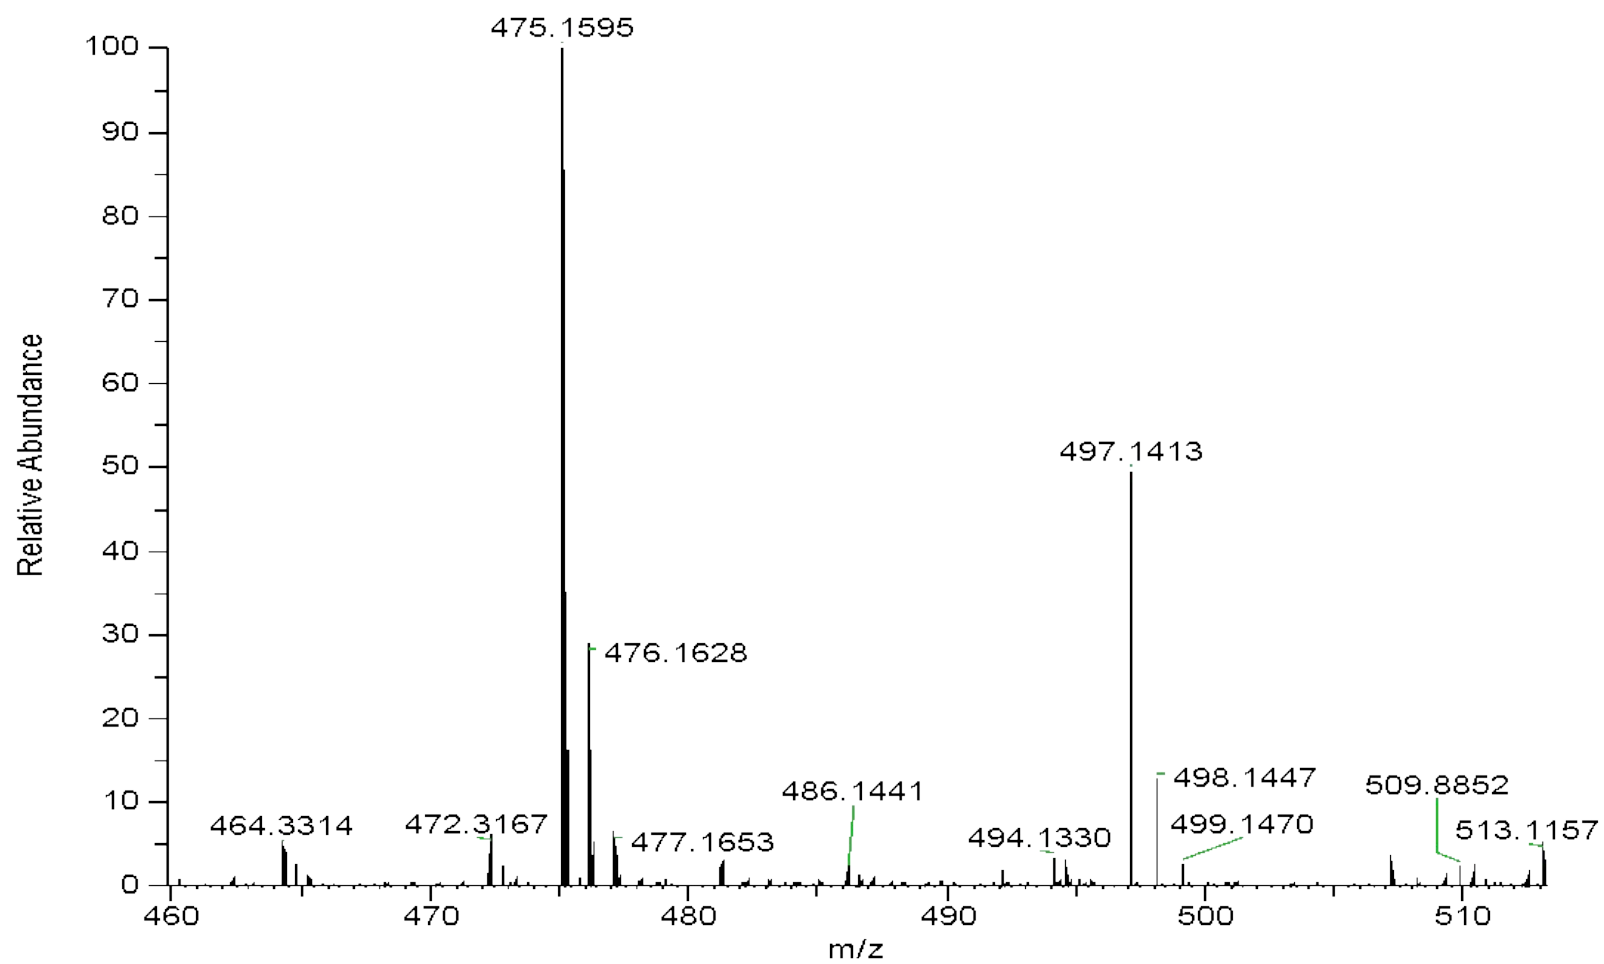

**Figure S13.** HRESIMS spectrum of herpotriquinone A (1).



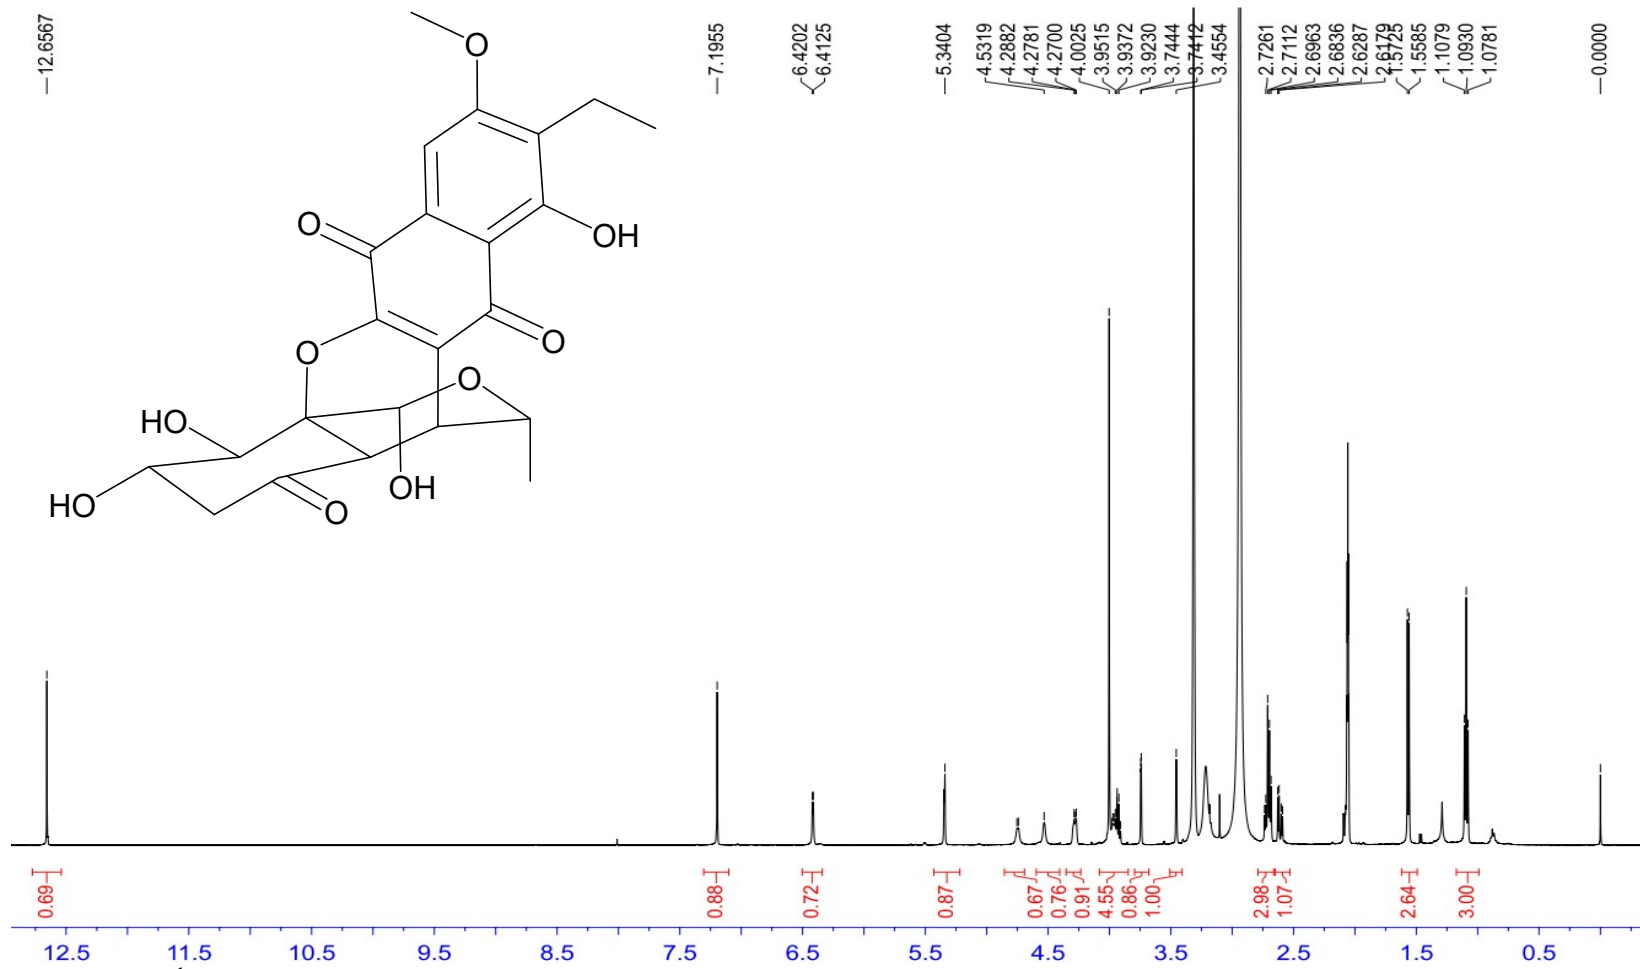

**Figure S14.** <sup>1</sup>H NMR spectrum of herpotriquinone B (2) in acetone-*d*<sub>6</sub> (500 MHz).

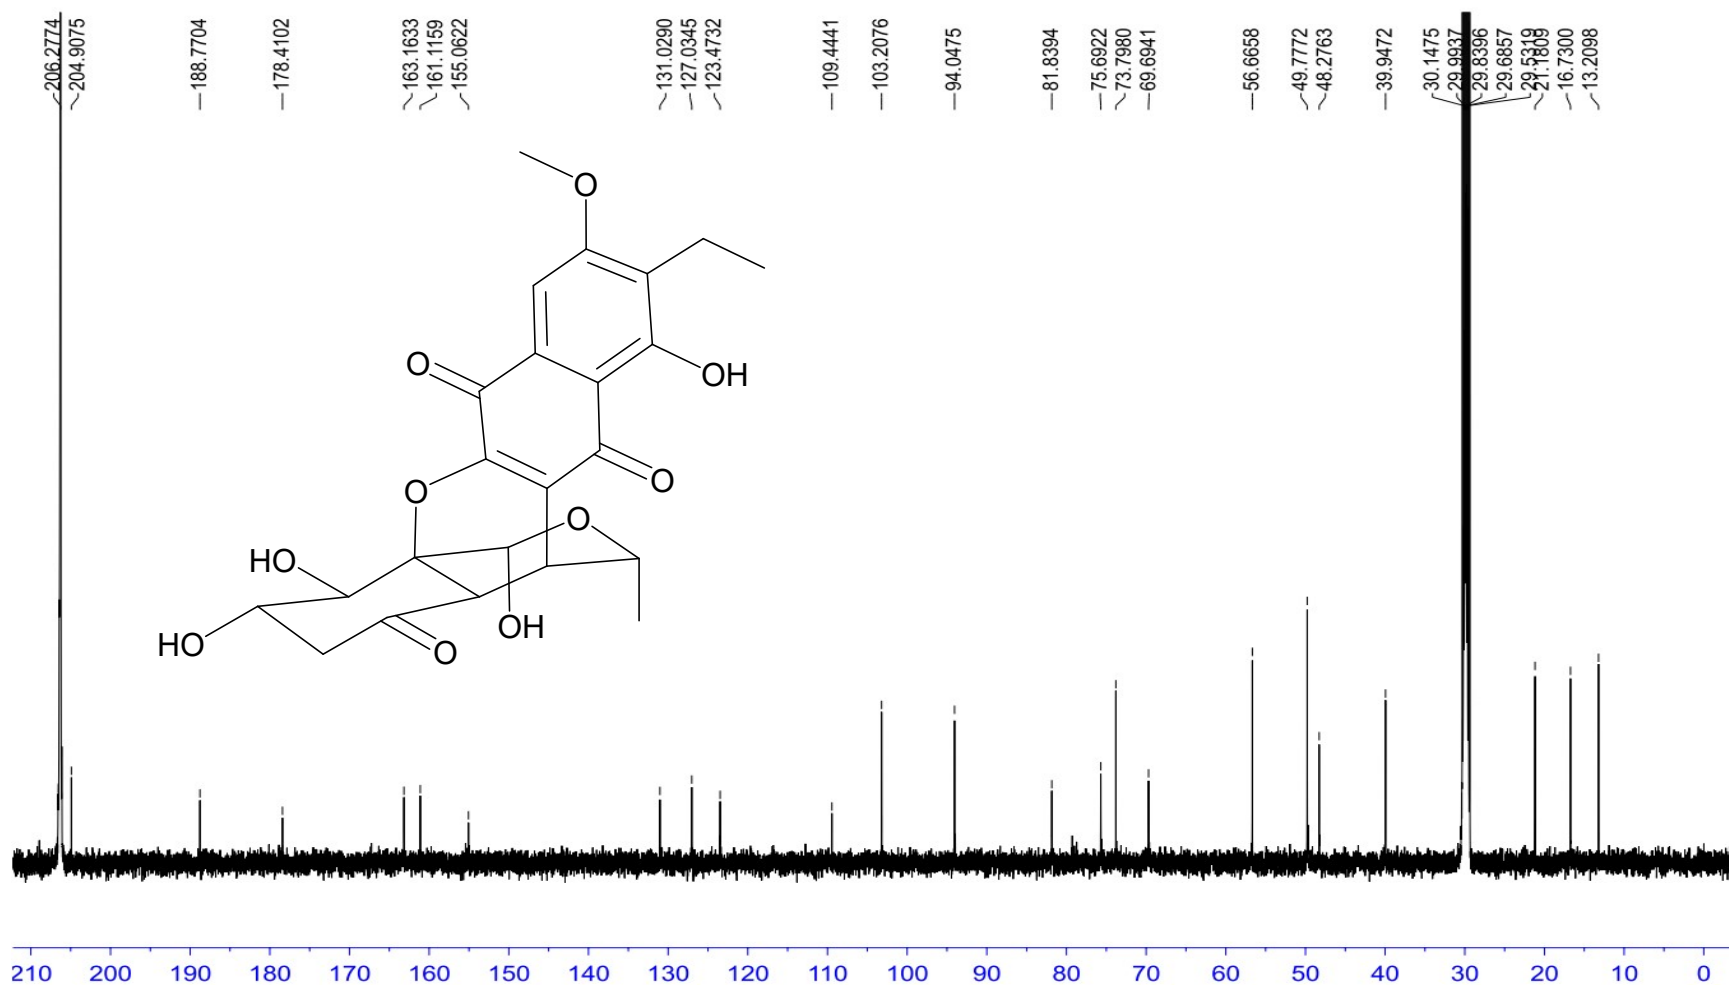

Figure S15.  $^{13}\text{C}$  NMR spectrum of herpotriquinone B (**2**) in acetone- $d_6$  (125 MHz).

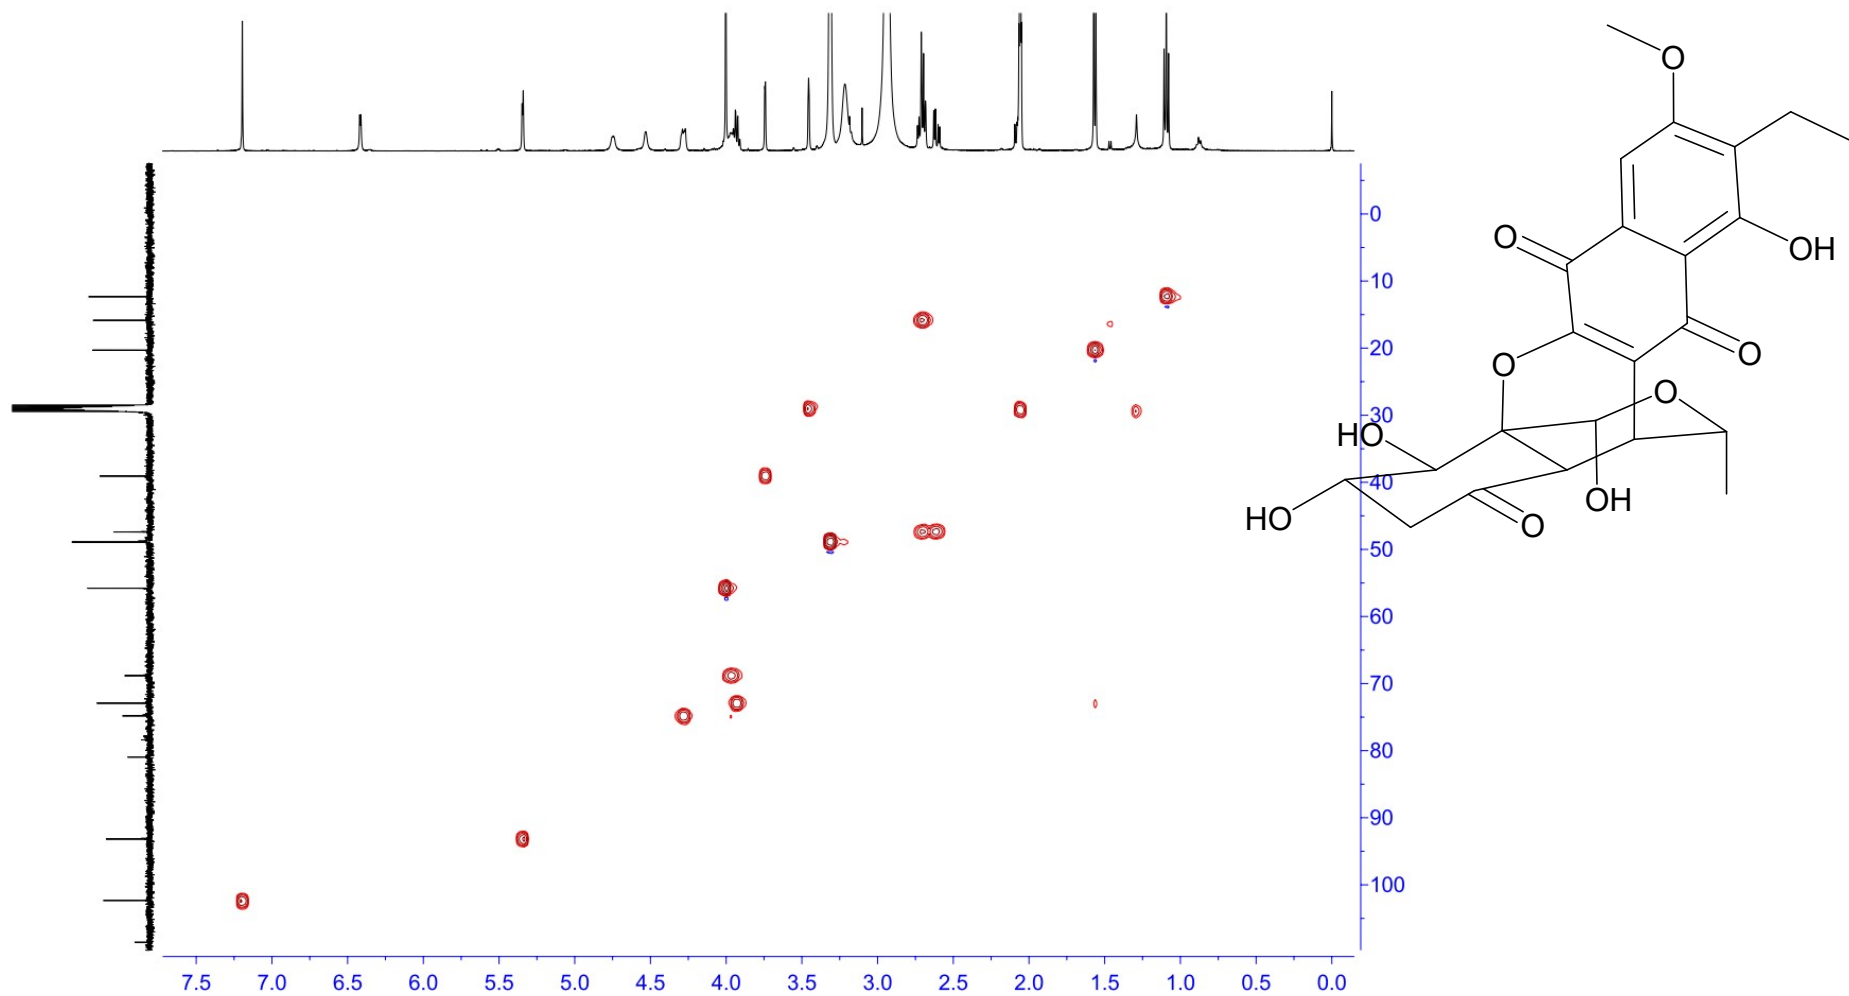

**Figure S16.** HMQC spectrum of herpotriquinone B (2) in acetone- $d_6$ .

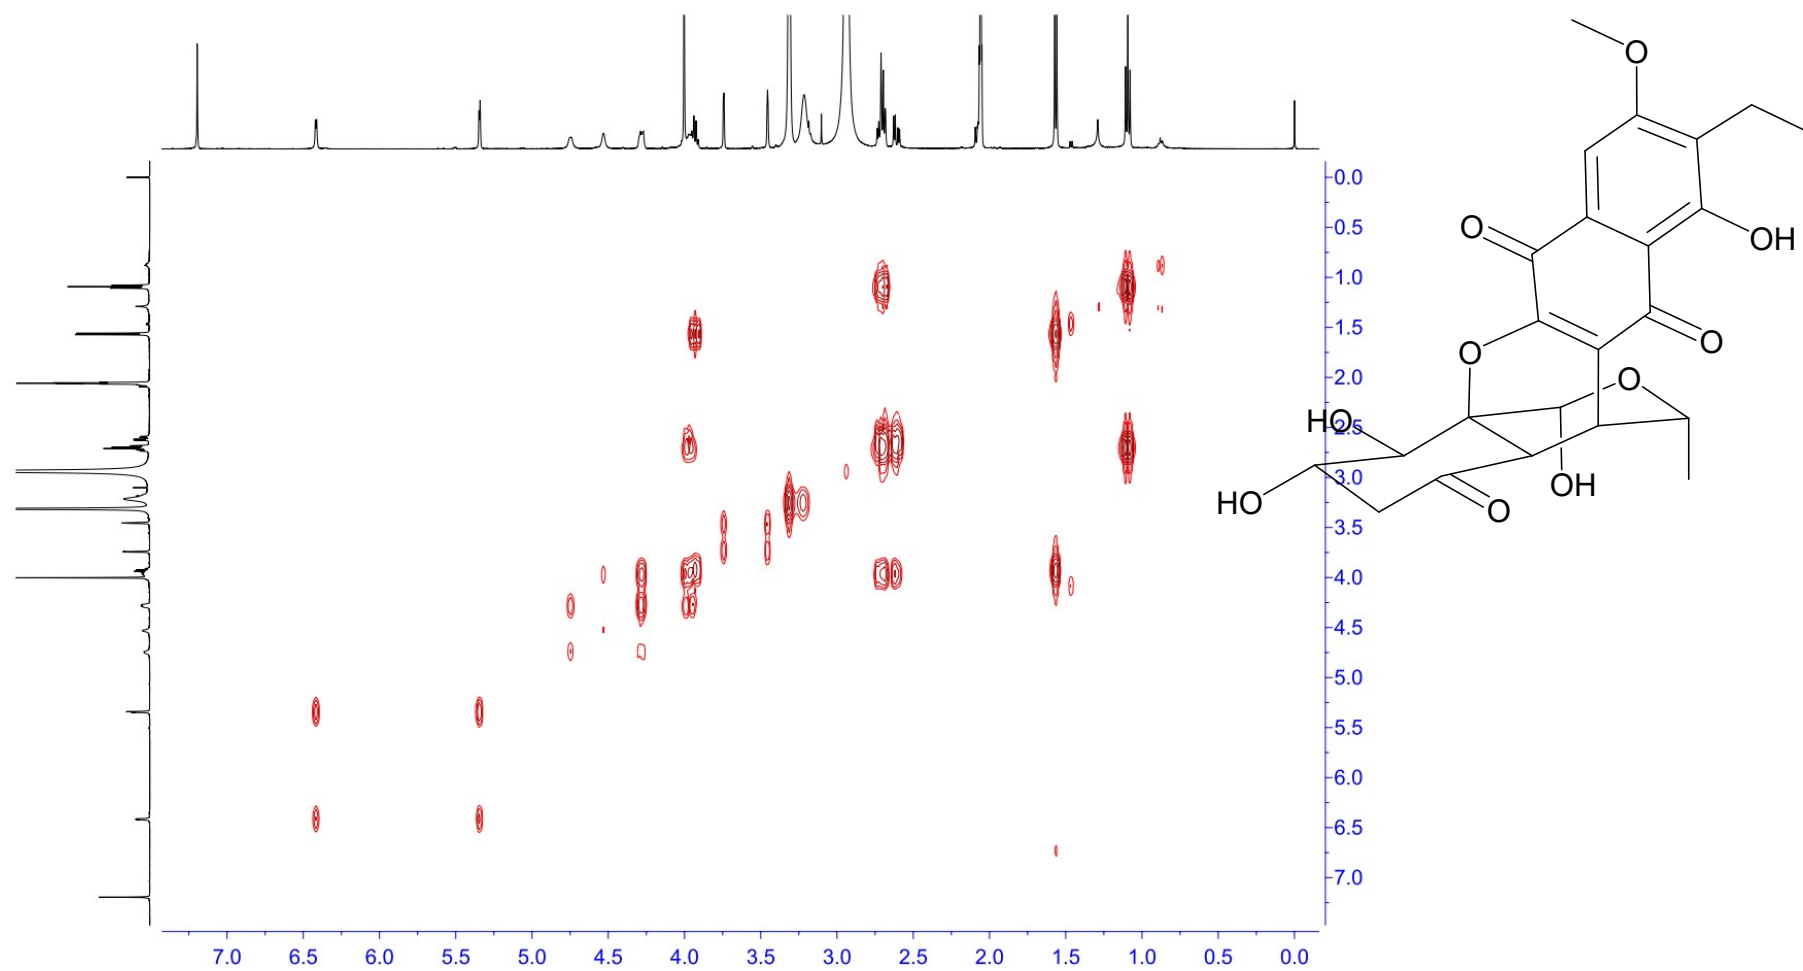

Figure S17.  $^1\text{H}$ - $^1\text{H}$  COSY spectrum of herpotriquinone B (2) in acetone- $d_6$ .

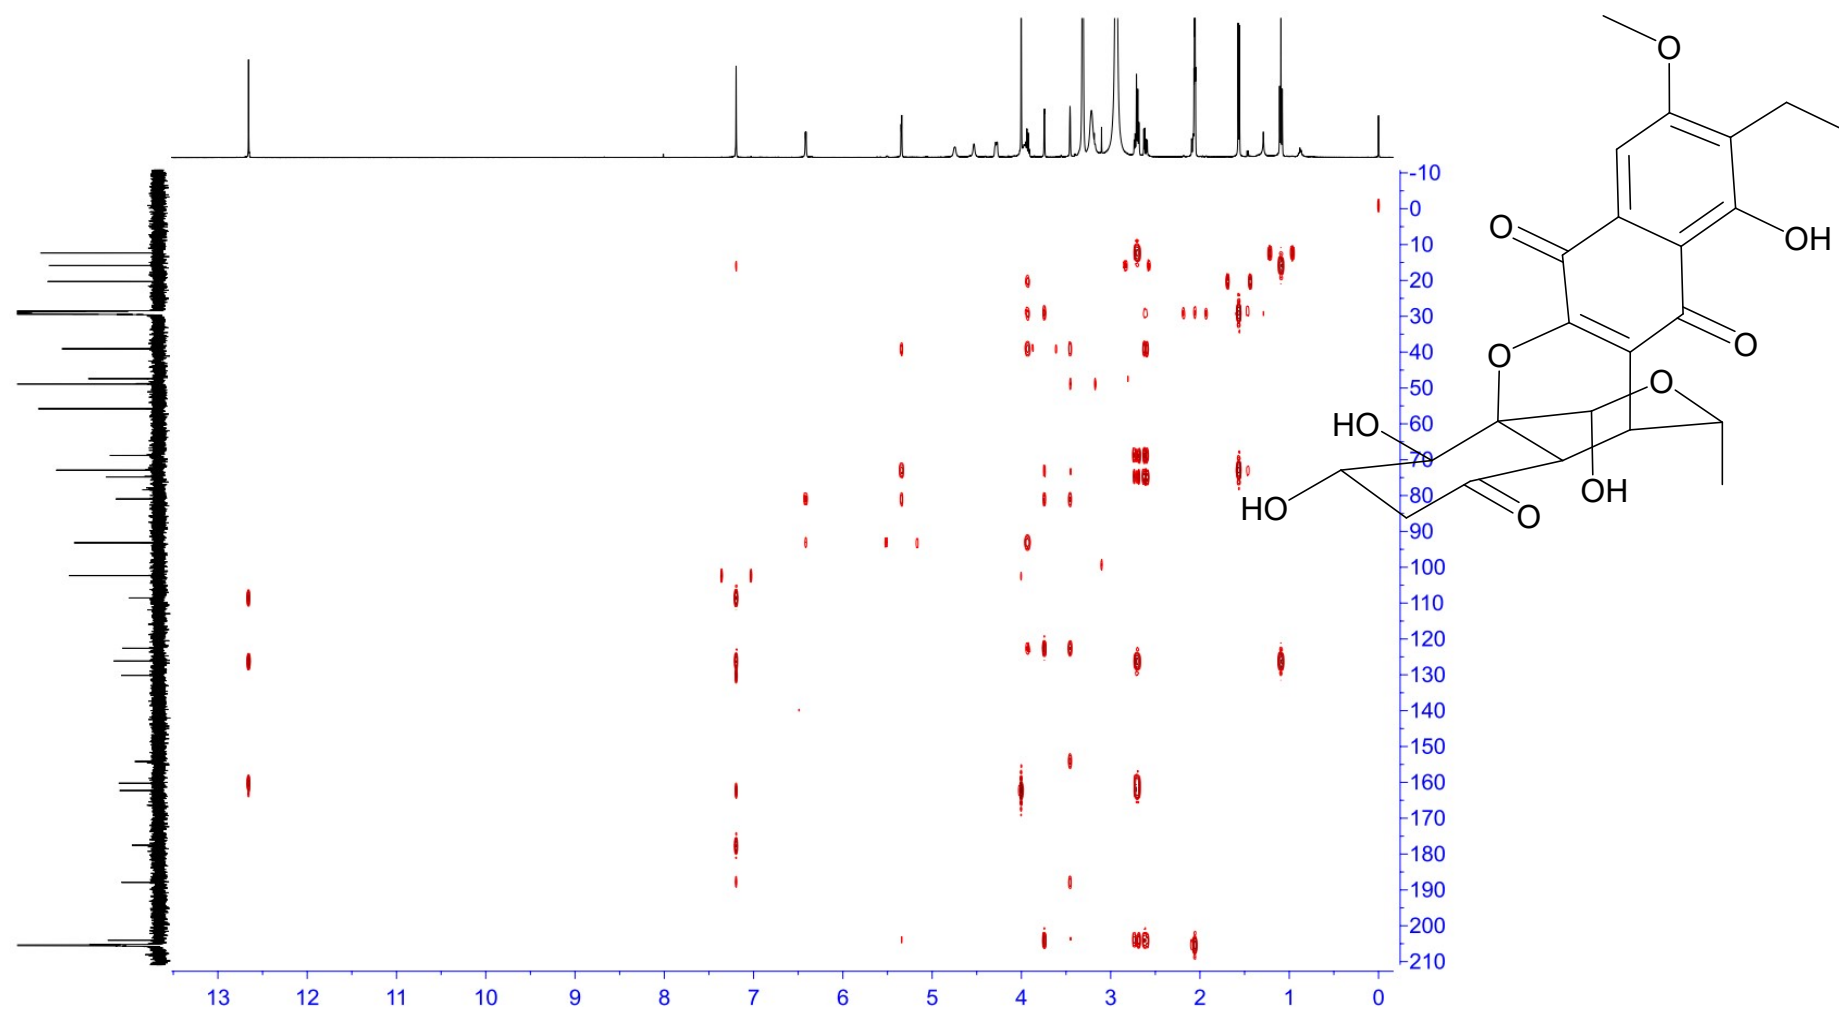

Figure S18. HMBC spectrum of herpotriquinone B (2) in acetone- $d_6$ .

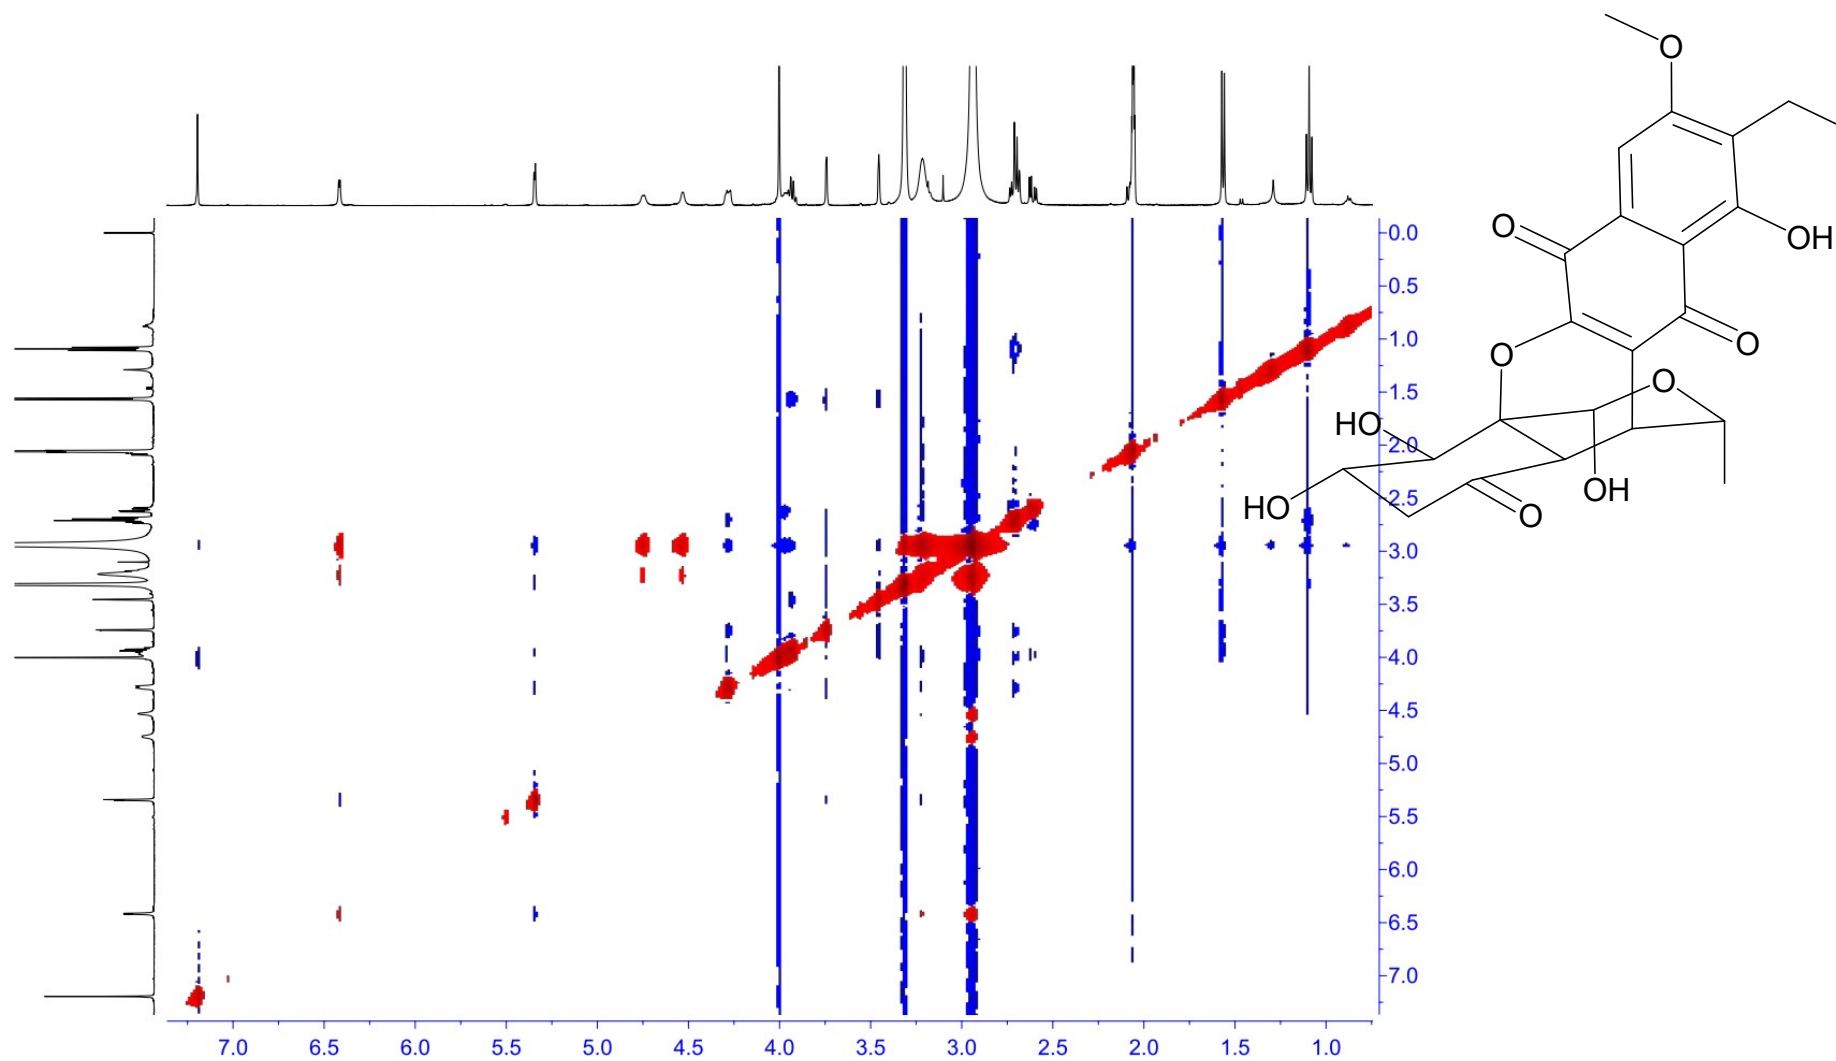

**Figure S19.** NOESY spectrum of herpotriquinone B (**2**) in acetone- $d_6$ .

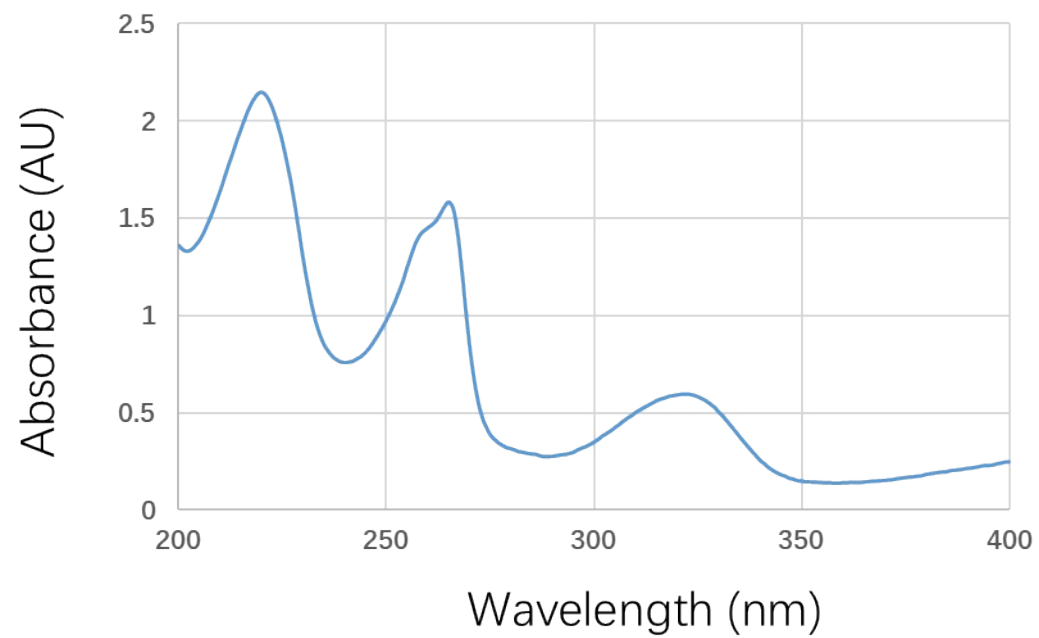

**Figure S20.** UV spectrum of herpotriquinone B (**2**) in methanol.

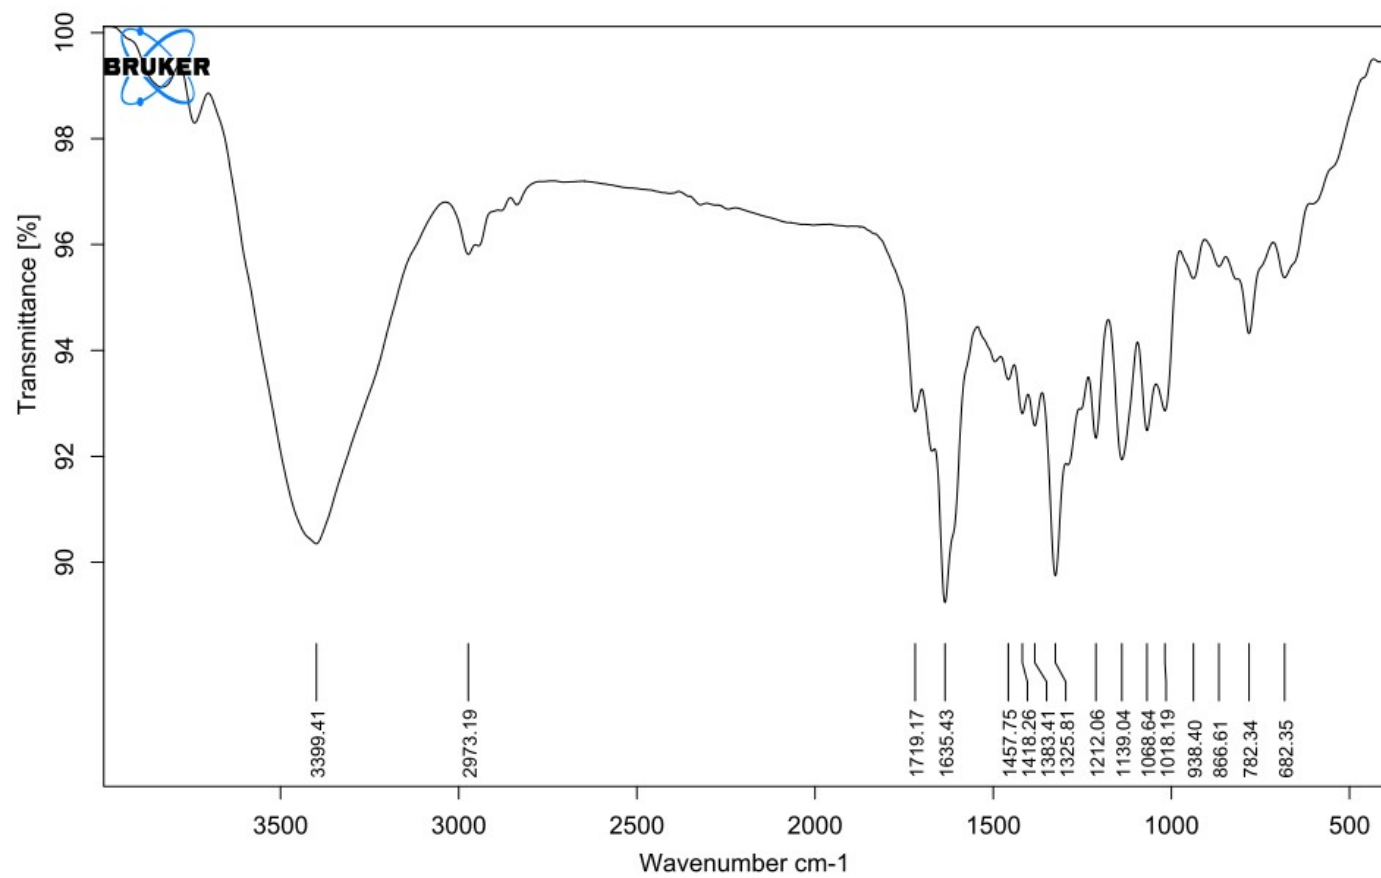

**Figure S21.** IR spectrum of herpotriquinone B (2).



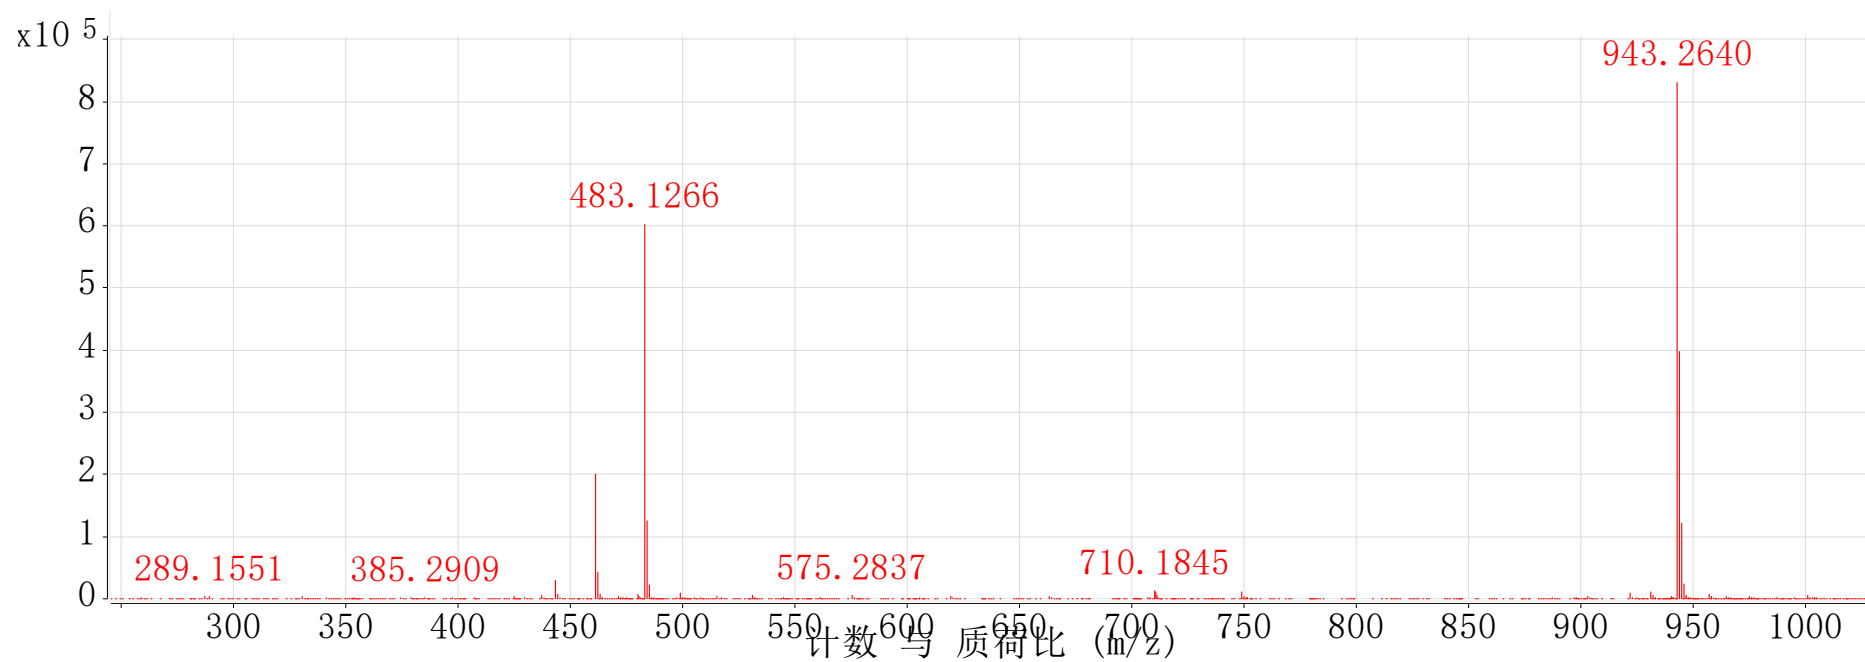

**Figure S22.** HRESIMS spectrum of herpotriquinone B (2).

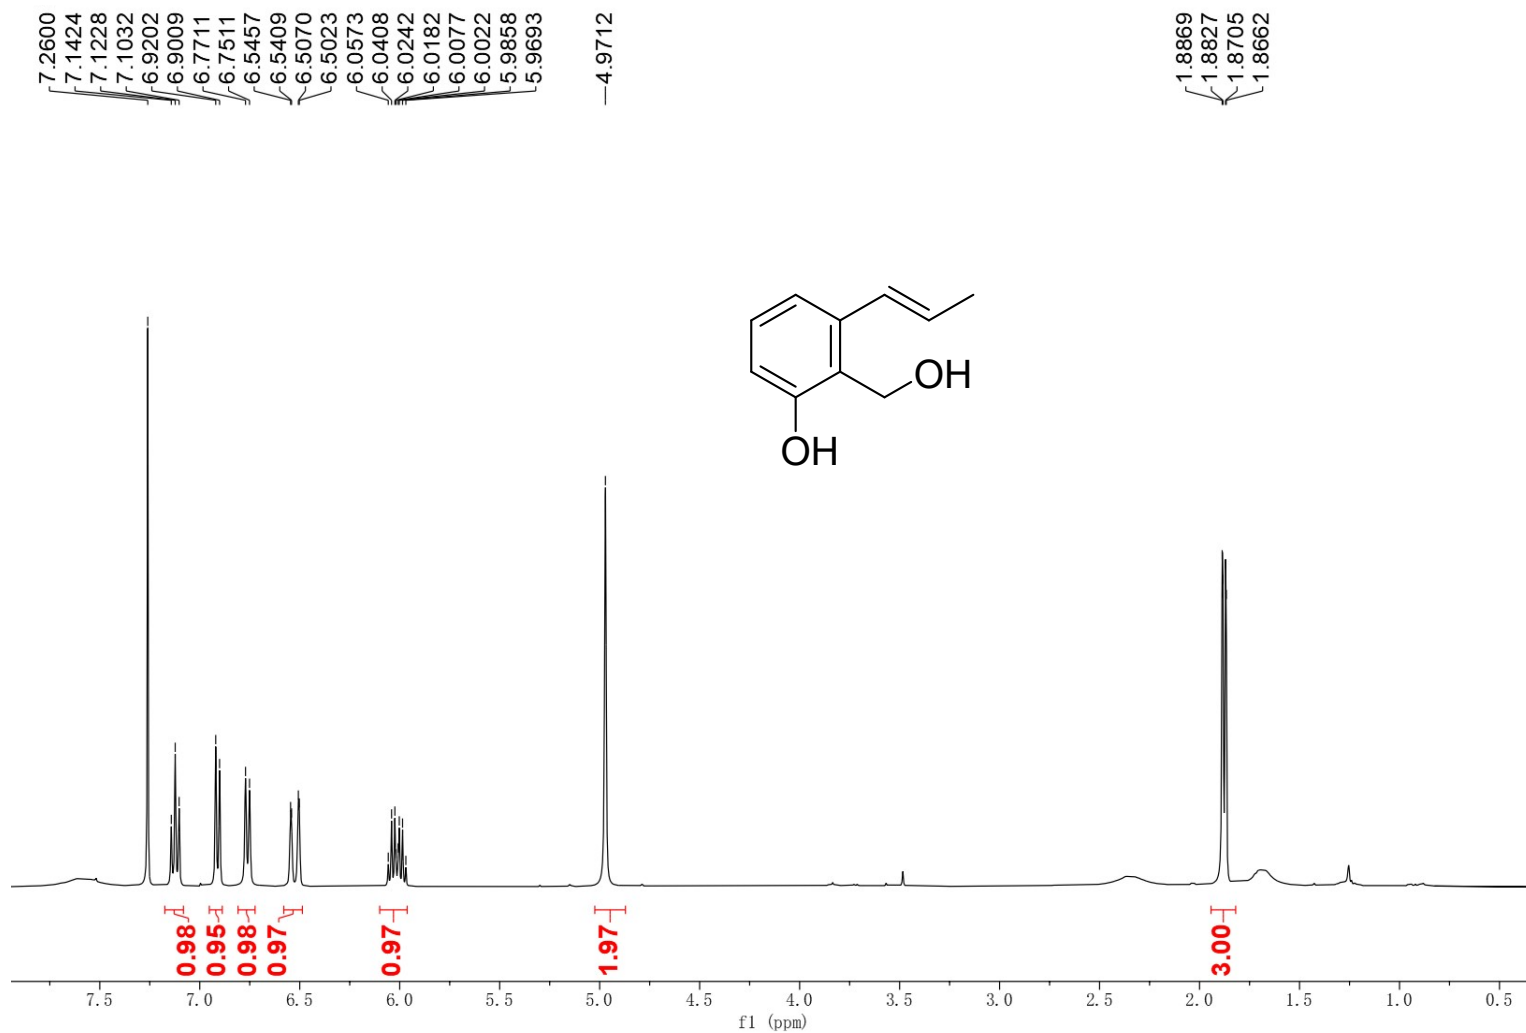

Figure S23. <sup>1</sup>H NMR spectrum of RKB 3564S (3) in CDCl<sub>3</sub> (400 MHz).

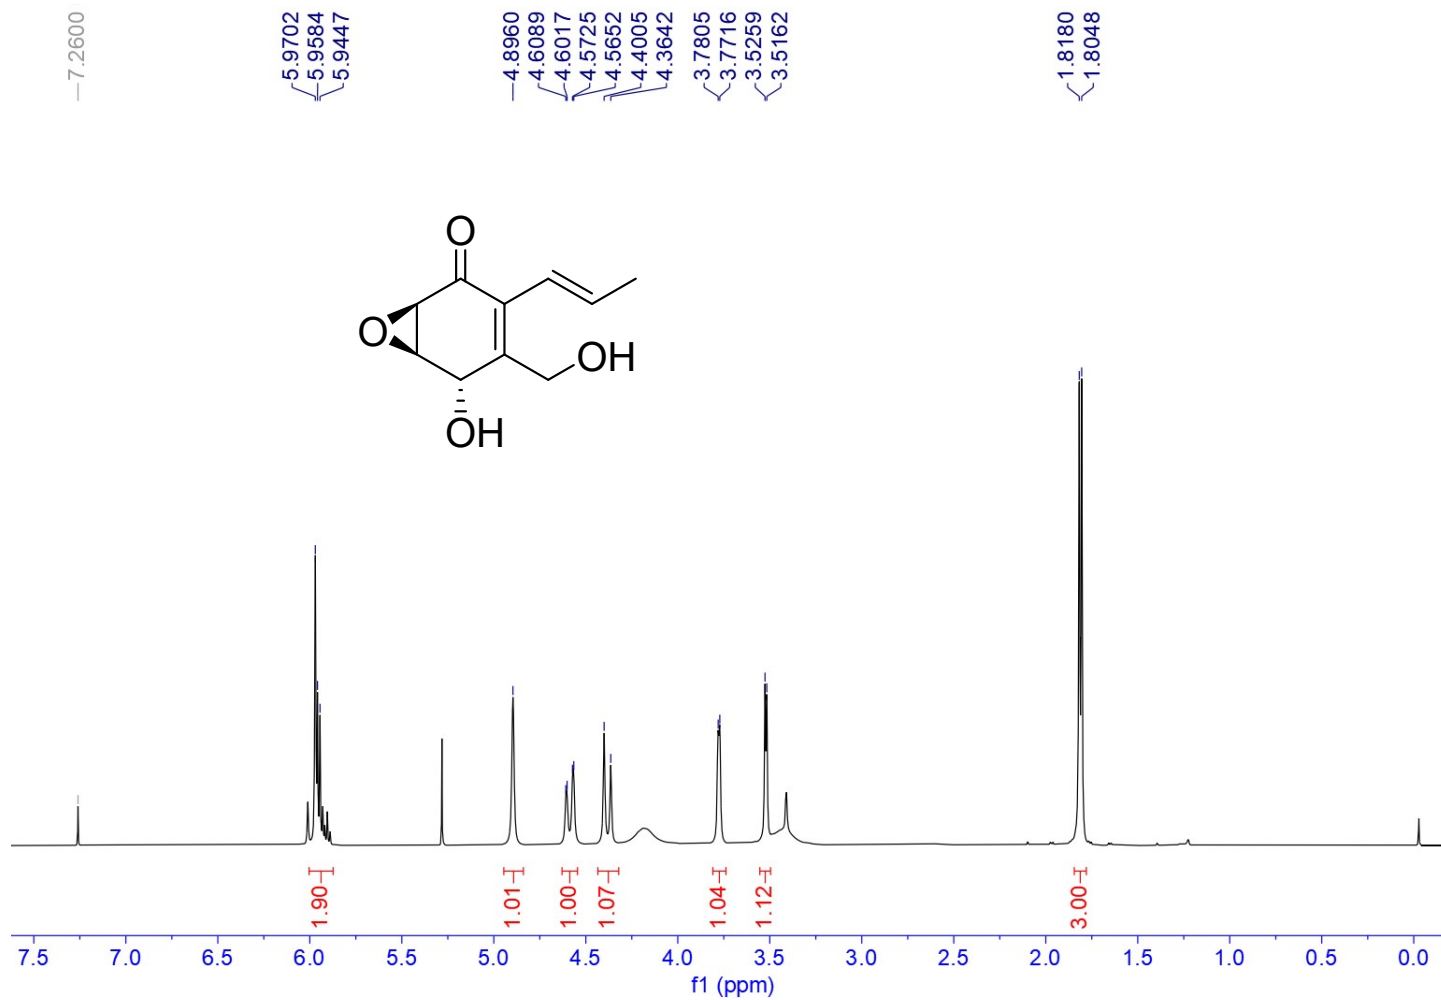

**Figure S24.**  $^1\text{H}$  NMR spectrum of epoxycyclohexenone (**4**) in  $\text{CDCl}_3$  (500 MHz).

**Table S1.**  $^1\text{H}$ ,  $^{13}\text{C}$ , NOESY and HMBC NMR data for **1** in acetone- $d_6$ .

| position | $\delta_{\text{C}}$ | $\delta_{\text{H}}$ (mult, $J$ , Hz) | NOESY    | HMBC        |
|----------|---------------------|--------------------------------------|----------|-------------|
| 1        | 12.8                | 1.10 (t, 7.3)                        |          | C3          |
| 2        | 16.4                | 2.71 (q, 7.3)                        |          | C4          |
| 3        | 128.2               |                                      |          |             |
| 4        | 160.8               |                                      |          |             |
| 5        | 108.7               |                                      |          |             |
| 6        | 187.0               |                                      |          |             |
| 7        | 122.9               |                                      |          |             |
| 8        | 153.0               |                                      |          |             |
| 9        | 179.3               |                                      |          |             |
| 10       | 129.4               |                                      |          |             |
| 11       | 103.2               | 7.15 (s)                             |          | C3, C5, C9  |
| 12       | 162.2               |                                      |          |             |
| 13       | 56.2                | 3.93 (s)                             |          | C12         |
| 14       | 19.6                | 1.54 (d, 7.0)                        | H16, H17 | C16         |
| 15       | 73.4                | 3.99 (q, 7.0)                        |          | C7, C17     |
| 16       | 29.0                | 3.53 (br s)                          | H14      | C6, C8, C22 |
| 17       | 39.9                | 3.40 (br s)                          | H19, H22 |             |
| 18       | 203.4               |                                      |          |             |
| 19a      | 47.2                | 2.88 (14.4, 5.1)                     | H17, H21 | C17, C21    |
| 19b      |                     | 2.60 (14.4, 12.5)                    |          |             |
| 20       | 68.9                | 4.07 (m)                             | H19      | C21         |
| 21       | 75.4                | 4.24 (br s)                          | H19, H23 |             |
| 22       | 80.2                |                                      |          |             |
| 23       | 99.7                | 4.91 (s)                             | H21      | C15, C17    |
| 24       | 56.2                | 3.53 (s)                             |          | C23         |
| 4-OH     |                     | 12.43 (s)                            |          | C3, C5      |
| 20-OH    |                     | 4.80 (br s)                          |          |             |
| 21-OH    |                     | 5.25 (br s)                          |          |             |

**Table S2.**  $^1\text{H}$ ,  $^{13}\text{C}$ , NOESY and HMBC NMR data for **2** in  $\text{CDCl}_3$ .

| position | $\delta_{\text{C}}$ | $\delta_{\text{H}}$ (mult, $J$ , Hz) | NOESY    | HMBC        |
|----------|---------------------|--------------------------------------|----------|-------------|
| 1        | 13.2                | 1.09 (t, 7.5)                        |          | C3          |
| 2        | 16.7                | 2.70 (q, 7.5)                        |          | C4          |
| 3        | 127.0               |                                      |          |             |
| 4        | 161.1               |                                      |          |             |
| 5        | 109.4               |                                      |          |             |
| 6        | 188.8               |                                      |          |             |
| 7        | 123.5               |                                      |          |             |
| 8        | 155.1               |                                      |          |             |
| 9        | 178.4               |                                      |          |             |
| 10       | 131.0               |                                      |          |             |
| 11       | 103.2               | 7.20 (s)                             |          | C3, C5, C9  |
| 12       | 163.2               |                                      |          |             |
| 13       | 56.7                | 4.00 (s)                             |          | C12         |
| 14       | 21.2                | 1.56 (d, 7.0)                        | H16, H17 | C16         |
| 15       | 73.8                | 3.93 (qd, 7.0, 1.0)                  |          | C7, C23     |
| 16       | 29.8                | 3.45 (br s)                          | H14      | C6, C8, C18 |
| 17       | 39.9                | 3.74 (d, 1.6)                        | H19, H21 | C7, C15     |
| 18       | 204.9               |                                      |          |             |
| 19a      | 48.3                | 2.72 (14.2, 5.1)                     | H17, H21 | C17, C21    |
| 19b      |                     | 2.61 (14.2, 5.4)                     |          |             |
| 20       | 69.7                | 3.97 (m)                             |          |             |
| 21       | 75.7                | 4.28 dd (9.1, 4.1)                   | H19, H23 |             |
| 22       | 81.8                |                                      |          |             |
| 23       | 94.0                | 5.34 (d, 3.9)                        | H21      |             |
| 4-OH     |                     | 12.66 (s)                            |          | C3, C5      |
| 20-OH    |                     | 4.53 (br s)                          |          |             |
| 21-OH    |                     | 4.75 (br d, 5.7)                     |          |             |
| 23-OH    |                     | 6.42 (d, 3.9)                        |          | C22         |

**Table S3.** Experimental and calculated  $^{13}\text{C}$  NMR chemical shifts of **2**.

| No. | $\delta_{\text{exptl.}}$ | $\delta_{\text{calcd.}}$ |
|-----|--------------------------|--------------------------|
| 1   | 13.2                     | 13.9                     |
| 2   | 16.7                     | 20.4                     |
| 3   | 127.0                    | 127.3                    |
| 4   | 161.1                    | 157.6                    |
| 5   | 109.4                    | 107.4                    |
| 6   | 188.8                    | 184.6                    |
| 7   | 123.5                    | 121.4                    |
| 8   | 155.1                    | 148.7                    |
| 9   | 178.4                    | 177.3                    |
| 10  | 131.0                    | 126.8                    |
| 11  | 103.2                    | 100.3                    |
| 12  | 163.2                    | 159.0                    |
| 13  | 56.7                     | 55.1                     |
| 14  | 21.2                     | 22.0                     |
| 15  | 73.8                     | 77.5                     |
| 16  | 29.8                     | 32.5                     |

|    |       |       |
|----|-------|-------|
| 17 | 39.9  | 41.5  |
| 18 | 204.9 | 205.6 |
| 19 | 48.3  | 47.8  |
| 20 | 69.7  | 72.2  |
| 21 | 75.7  | 76.3  |
| 22 | 81.8  | 82.7  |
| 23 | 94.0  | 94.8  |

**Table S4.** Experimental and calculated <sup>1</sup>H NMR chemical shifts of **2**.

| No. | $\delta_{\text{exptl.}}$ | $\delta_{\text{calcd.}}$ |
|-----|--------------------------|--------------------------|
| 1   | 1.09                     | 1.01                     |
| 2   | 2.7                      | 2.64                     |
| 11  | 7.2                      | 7.61                     |
| 13  | 4.0                      | 3.92                     |
| 14  | 1.56                     | 1.42                     |
| 15  | 3.93                     | 3.8                      |
| 16  | 3.45                     | 3.38                     |
| 17  | 3.74                     | 3.58                     |
| 19a | 2.72                     | 2.66                     |
| 19b | 2.61                     | 2.48                     |
| 20  | 3.97                     | 3.68                     |
| 21  | 4.28                     | 4.07                     |
| 23  | 5.34                     | 5.2                      |

**Table S5.** Comparison of key parameters of **2** in NMR computation.

| atom_type       | parameters | <b>2</b>               |
|-----------------|------------|------------------------|
| <sup>13</sup> C | $R^2$      | 0.9986                 |
|                 | MAE        | 2.2                    |
|                 | CMAE       | 1.8                    |
| <sup>1</sup> H  | $R^2$      | 0.9931                 |
|                 | MAE        | 0.15                   |
|                 | CMAE       | 0.1                    |
| <sup>13</sup> C | formula    | $y = 0.9695x + 2.4163$ |
| <sup>1</sup> H  | formula    | $y = 1.0533x - 0.2788$ |

**Table S6.** Primer sequences of genes

| Gene           | Forward primer (5'→3') | Reverse primer (5'→3') |
|----------------|------------------------|------------------------|
| <i>β-actin</i> | TCGTCCACCGCAAAYGCTTCTA | CCGTCACCTTCACCGTTCCAGT |
| <i>jnk</i>     | CAAACCTCTGCCAGGTCATT   | GCCGAAATCCAAAATCTTCA   |
| <i>il-1β</i>   | TGGACTTCGCAGCACAAAATG  | GTTCACTTCACGCTCTTGGATG |
| <i>tgf-β</i>   | CCCAAGGAACCAGAAGTAGAAG | GGATCTTCTATGGTGTGCTGAA |
| <i>il-10</i>   | TCACGTCATGAACGAGATCC   | CCTCTTGCATTTACCATATCC  |

**Table S7.** Anti-neuroinflammatory activity of **1** and **2** (IC<sub>50</sub> in  $\mu\text{M}$ ).

| compound                   | IC <sub>50</sub> ( $\mu\text{M}$ ) | survival rate (%) <sup>a</sup> |
|----------------------------|------------------------------------|--------------------------------|
| <b>1</b>                   | 5.17 $\pm$ 0.35                    | 106.1 $\pm$ 9.5                |
| <b>2</b>                   | 7.52 $\pm$ 0.81                    | 97.5 $\pm$ 9.2                 |
| dexamethasone <sup>b</sup> | 7.98 $\pm$ 0.79                    | 103.9 $\pm$ 8.3                |

<sup>a</sup>Survival rate (%) of BV-2 microglial cells at 20  $\mu\text{M}$  was expressed as the mean  $\pm$  SD from three independent experiments; <sup>b</sup>positive control.

**Table S8.** Conformational analysis of the B3LYP/6-31G(d) optimized conformers of **2** in the gas phase (T=298.15 K)

| Conformer  | E <sup>a</sup> (Hartree) | C <sup>b</sup> (Hartree) | G <sup>c</sup> (kcal/mol) | $\Delta\text{G}^d$ (kcal/mol) | Population <sup>e</sup> |
|------------|--------------------------|--------------------------|---------------------------|-------------------------------|-------------------------|
| M9-4-2-1-1 | -1643.042408             | 0.387467                 | -1030765.975408           | 0.0                           | 50.81%                  |
| M9-4-2-1-2 | -1643.042209             | 0.387299                 | -1030765.956176           | 0.019233                      | 49.19%                  |

<sup>a</sup>Electronic energy obtained at M062X/6-311+G(2d,p) level of theory; <sup>b</sup>Thermal correction to Gibbs free energy obtained at B3LYP/6-31G(d) level of theory; <sup>c</sup>Gibbs free energy (E + C); <sup>d</sup>The relative Gibbs free energy; <sup>e</sup>The Boltzmann distribution of each conformer.

**Table S9.** Atomic coordinates ( $\text{\AA}$ ) of **2** obtained at the B3LYP/6-31G(d) level of theory in the gas phase

|   |           |           |           |   |           |           |           |
|---|-----------|-----------|-----------|---|-----------|-----------|-----------|
| C | -6.428645 | 0.671850  | 1.656827  | O | -1.063662 | 2.665798  | 0.579757  |
| C | -5.965100 | 0.924333  | 0.211498  | O | 1.561554  | 0.460174  | 2.811191  |
| C | -4.589114 | 0.366004  | -0.042276 | O | 4.515702  | -2.982313 | 1.643544  |
| C | -3.446896 | 1.159062  | 0.182797  | O | 3.944491  | -2.358687 | -1.055756 |
| C | -2.144736 | 0.640564  | -0.020830 | H | 3.663928  | 1.310889  | 0.811543  |
| C | -0.966874 | 1.472897  | 0.220188  | H | 1.362687  | 2.450177  | 1.059367  |
| C | 0.364412  | 0.891656  | 0.018406  | H | 4.898649  | -0.945140 | 0.031891  |
| C | 0.494150  | -0.370965 | -0.446452 | H | -2.964043 | -2.511162 | -1.001497 |
| C | -0.665232 | -1.277095 | -0.691099 | H | -4.954987 | -3.105751 | -2.034470 |
| C | -2.009837 | -0.693979 | -0.456241 | H | -4.873122 | -3.638376 | -0.328016 |
| C | -3.122593 | -1.492632 | -0.673282 | H | -6.458756 | -3.406315 | -1.117666 |
| C | -4.405245 | -0.961618 | -0.454478 | H | -5.950709 | 2.000118  | 0.016806  |
| C | -5.435255 | -3.035350 | -1.051113 | H | -6.672353 | 0.464744  | -0.484807 |
| C | 3.051085  | 3.553829  | -0.786258 | H | -6.464985 | -0.401612 | 1.869356  |
| C | 2.006836  | 2.461203  | -1.008675 | H | -5.742480 | 1.141595  | 2.368749  |
| C | 1.589712  | 1.719140  | 0.281397  | H | -7.429111 | 1.087582  | 1.820309  |
| C | 2.712001  | 0.772858  | 0.724350  | H | -2.736546 | 2.827250  | 0.695240  |
| C | 2.464674  | 0.110022  | 2.080224  | H | 2.547364  | -2.506429 | 1.185590  |
| C | 3.445293  | -0.994435 | 2.431977  | H | 4.444000  | -0.555678 | 2.570049  |
| C | 3.531859  | -2.023738 | 1.302694  | H | 3.145799  | -1.464853 | 3.370870  |
| C | 3.892966  | -1.366159 | -0.035747 | H | 3.281251  | -0.194704 | -2.530585 |
| C | 2.908241  | -0.250383 | -0.398830 | H | 1.110743  | 2.925281  | -1.428874 |
| C | 3.304818  | 0.501616  | -1.687010 | H | 4.876355  | 1.470408  | -2.260365 |
| O | -3.639737 | 2.419689  | 0.600653  | H | 3.962064  | 3.176052  | -0.317486 |
| O | 1.680590  | -0.968274 | -0.678282 | H | 3.323379  | 4.001009  | -1.747546 |

|   |           |           |           |   |          |           |           |
|---|-----------|-----------|-----------|---|----------|-----------|-----------|
| O | -0.484824 | -2.431910 | -1.054996 | H | 2.626907 | 4.339881  | -0.152106 |
| O | -5.544117 | -1.683512 | -0.623205 | H | 4.665000 | -3.497494 | 0.831128  |
| O | 2.392997  | 1.512733  | -2.030665 | H | 3.020289 | -2.617178 | -1.227087 |
| O | 4.611951  | 0.988506  | -1.460842 | - | -        | -         | -         |

**Table S10.** Atomic coordinates (Å) of **2** obtained at the B3LYP/6-31G(d) level of theory in the gas phase

|   |           |           |           |   |           |           |           |
|---|-----------|-----------|-----------|---|-----------|-----------|-----------|
| C | -6.606086 | 1.379310  | -0.537692 | O | -1.083944 | 2.565160  | 0.869087  |
| C | -5.956865 | 0.719923  | 0.691613  | O | 1.762081  | 0.344387  | 2.838209  |
| C | -4.580568 | 0.189869  | 0.385288  | O | 4.746771  | -2.930321 | 1.320074  |
| C | -3.448129 | 1.009136  | 0.559746  | O | 3.944220  | -2.232059 | -1.301371 |
| C | -2.148001 | 0.533022  | 0.261776  | H | 3.685530  | 1.350679  | 0.730729  |
| C | -0.979315 | 1.388516  | 0.461017  | H | 1.374246  | 2.399500  | 1.191078  |
| C | 0.351177  | 0.852232  | 0.156734  | H | 4.929758  | -0.825219 | -0.232909 |
| C | 0.484282  | -0.386672 | -0.367378 | H | -2.950025 | -2.588200 | -0.824469 |
| C | -0.665101 | -1.313576 | -0.579686 | H | -4.810643 | -3.784733 | -0.105150 |
| C | -2.007091 | -0.777541 | -0.239513 | H | -6.429242 | -3.551411 | -0.824990 |
| C | -3.112140 | -1.592746 | -0.433192 | H | -4.967226 | -3.187081 | -1.784665 |
| C | -4.392771 | -1.102845 | -0.124564 | H | -6.587626 | -0.102508 | 1.040790  |
| C | -5.410429 | -3.164409 | -0.781858 | H | -5.880139 | 1.452820  | 1.499399  |
| C | 2.893602  | 3.626250  | -0.728242 | H | -6.707458 | 0.658203  | -1.355440 |
| C | 1.864545  | 2.513307  | -0.916512 | H | -7.603504 | 1.759531  | -0.290701 |
| C | 1.566654  | 1.707781  | 0.369032  | H | -5.998176 | 2.218543  | -0.890594 |
| C | 2.746936  | 0.784183  | 0.689772  | H | -2.750453 | 2.679098  | 1.083352  |
| C | 2.622273  | 0.059431  | 2.031149  | H | 2.732396  | -2.519304 | 1.032016  |
| C | 3.665477  | -1.018150 | 2.265518  | H | 4.655389  | -0.546520 | 2.346914  |
| C | 3.703814  | -2.001036 | 1.093053  | H | 3.454588  | -1.534374 | 3.204461  |
| C | 3.936920  | -1.280579 | -0.241454 | H | 3.093997  | -0.041200 | -2.635763 |
| C | 2.890899  | -0.189448 | -0.485199 | H | 0.927221  | 2.966822  | -1.249029 |
| C | 3.162202  | 0.623775  | -1.769601 | H | 4.655536  | 1.662186  | -2.424945 |
| O | -3.648328 | 2.254152  | 1.018831  | H | 3.077910  | 4.120886  | -1.687173 |
| O | 1.669175  | -0.939590 | -0.698417 | H | 2.499955  | 4.372169  | -0.029223 |
| O | -0.479467 | -2.446054 | -1.005698 | H | 3.847859  | 3.255683  | -0.348688 |
| O | -5.526105 | -1.832546 | -0.296919 | H | 4.852220  | -3.408490 | 0.478702  |
| O | 2.196017  | 1.615799  | -2.001548 | H | 3.018735  | -2.516806 | -1.413840 |
| O | 4.467761  | 1.144987  | -1.625838 | - | -         | -         | -         |

**Table S11.** Key transitions, oscillator strengths, and rotatory strengths in the ECD spectrum of conformer **2-1** at the PBE1PBE/6-311G(d) level of theory in MeOH with IEFPCM solvent model.

| <i>Num</i> <sup>a</sup> | <i>Transition</i> <sub>b</sub> | <i>CI-coeff</i> <sup>c</sup> | <i>ΔE (eV)</i> <sup>d</sup> | <i>λ (nm)</i> <sup>e</sup> | <i>f</i> <sup>f</sup> | <i>R<sub>vel</sub></i> <sup>g</sup> | <i>R<sub>len</sub></i> <sup>h</sup> |
|-------------------------|--------------------------------|------------------------------|-----------------------------|----------------------------|-----------------------|-------------------------------------|-------------------------------------|
| 1                       | 121->122                       | 0.68711                      | 2.6599                      | 466.13                     | 0.0244                | -7.4433                             | -7.6011                             |
| 2                       | 120->122                       | 0.68815                      | 2.9726                      | 417.09                     | 0.1535                | -9.877                              | -8.8881                             |
| 3                       | 116->122                       | 0.48185                      | 3.0916                      | 401.04                     | 0.0013                | -4.1891                             | -4.5016                             |
|                         | 117->122                       | -0.43271                     |                             |                            |                       |                                     |                                     |
| 4                       | 114->122                       | 0.47372                      | 3.5014                      | 354.10                     | 0.0023                | 0.219                               | -0.0313                             |
|                         | 115->122                       | 0.32943                      |                             |                            |                       |                                     |                                     |



|    |          |          |        |        |        |          |          |
|----|----------|----------|--------|--------|--------|----------|----------|
|    | 119->122 | 0.32109  |        |        |        |          |          |
| 5  | 114->122 | -0.28176 | 3.5451 | 349.73 | 0.0136 | 3.6132   | 3.7327   |
|    | 119->122 | 0.58509  |        |        |        |          |          |
| 6  | 118->122 | 0.64721  | 3.7427 | 331.27 | 0.1072 | 22.5506  | 24.7011  |
| 7  | 116->122 | 0.46318  | 3.9836 | 311.24 | 0.0498 | -3.2972  | -3.5113  |
|    | 117->122 | 0.49561  |        |        |        |          |          |
| 8  | 114->122 | -0.33996 | 4.2884 | 289.11 | 0.0042 | -1.6648  | -2.1308  |
|    | 115->122 | 0.59545  |        |        |        |          |          |
| 9  | 118->123 | 0.27581  | 4.4035 | 281.56 | 0.0001 | -3.7817  | -5.1019  |
|    | 119->123 | 0.47055  |        |        |        |          |          |
|    | 119->124 | 0.24491  |        |        |        |          |          |
| 10 | 113->122 | 0.67844  | 4.7515 | 260.94 | 0.0085 | -1.7445  | -1.5418  |
| 11 | 112->122 | 0.68287  | 4.8425 | 256.03 | 0.0032 | -3.4611  | -3.7026  |
| 12 | 111->122 | 0.67963  | 4.9785 | 249.04 | 0.0062 | 1.3305   | 1.1924   |
| 13 | 121->123 | 0.51623  | 5.0275 | 246.61 | 0.2615 | 14.9016  | 14.3701  |
|    | 121->124 | -0.27686 |        |        |        |          |          |
| 14 | 110->122 | 0.3789   | 5.1513 | 240.68 | 0.0166 | 10.5904  | 9.6757   |
|    | 121->123 | 0.40281  |        |        |        |          |          |
| 15 | 110->122 | -0.31317 | 5.2139 | 237.80 | 0.1369 | -25.6337 | -26.8434 |
|    | 121->124 | 0.52623  |        |        |        |          |          |
| 16 | 110->122 | -0.41189 | 5.2952 | 234.14 | 0.0238 | 4.1786   | 5.5539   |
|    | 120->123 | 0.43823  |        |        |        |          |          |
|    | 120->124 | -0.25816 |        |        |        |          |          |
| 17 | 109->122 | 0.64805  | 5.3755 | 230.65 | 0.0003 | 0.3974   | 0.3291   |
| 18 | 120->123 | 0.44603  | 5.4390 | 227.95 | 0.0292 | -0.2542  | -0.4137  |
|    | 120->124 | 0.47599  |        |        |        |          |          |
| 19 | 105->122 | 0.22835  | 5.5467 | 223.53 | 0.0030 | -6.9989  | -6.9708  |
|    | 108->122 | 0.62995  |        |        |        |          |          |
| 20 | 107->122 | 0.64011  | 5.6167 | 220.74 | 0.0119 | -7.2125  | -7.5824  |
| 21 | 118->123 | 0.44326  | 5.6846 | 218.11 | 0.0205 | -4.5284  | -4.7349  |
|    | 119->123 | -0.38358 |        |        |        |          |          |
| 22 | 118->124 | -0.22765 | 5.7216 | 216.69 | 0.5563 | -23.0874 | -23.6571 |
|    | 120->124 | -0.27879 |        |        |        |          |          |
|    | 120->125 | 0.42852  |        |        |        |          |          |
|    | 121->125 | 0.29135  |        |        |        |          |          |
| 23 | 105->122 | -0.23302 | 5.7670 | 214.99 | 0.0024 | 3.5658   | 3.7798   |
|    | 116->123 | 0.30767  |        |        |        |          |          |
|    | 116->124 | -0.3082  |        |        |        |          |          |
|    | 117->123 | -0.2622  |        |        |        |          |          |
| 24 | 117->124 | 0.32007  | 5.8116 | 213.34 | 0.0015 | 6.1767   | 6.2571   |
|    | 105->122 | 0.53141  |        |        |        |          |          |
|    | 116->123 | 0.27247  |        |        |        |          |          |
|    | 117->123 | 0.37968  |        |        |        |          |          |
|    | 118->123 | 0.35785  |        |        |        |          |          |
| 25 | 120->125 | -0.24387 | 5.8743 | 211.06 | 0.0246 | 1.0197   | 1.5944   |
|    | 120->125 | -0.36108 |        |        |        |          |          |
|    | 121->125 | 0.49616  |        |        |        |          |          |
|    | 118->124 | 0.22621  |        |        |        |          |          |
| 26 | 119->123 | -0.25665 | 6.0225 | 205.87 | 0.0052 | -1.511   | -1.55    |
|    | 119->124 | 0.57006  |        |        |        |          |          |
|    | 118->124 | 0.55268  |        |        |        |          |          |
| 27 | 119->124 | -0.24091 | 6.0463 | 205.06 | 0.0448 | 4.4689   | 3.3909   |
|    | 118->124 | 0.55268  |        |        |        |          |          |
| 28 | 103->122 | 0.23097  | 6.0832 | 203.81 | 0.0019 | 4.5856   | 4.1975   |
|    | 104->122 | -0.38537 |        |        |        |          |          |
|    | 106->122 | 0.40493  |        |        |        |          |          |

|    |          |          |        |        |        |         |         |
|----|----------|----------|--------|--------|--------|---------|---------|
| 30 | 104->122 | 0.44059  | 6.1446 | 201.78 | 0.0012 | -0.0022 | 0.1928  |
|    | 106->122 | 0.47588  |        |        |        |         |         |
| 31 | 104->122 | -0.24154 | 6.1750 | 200.78 | 0.0004 | -2.6109 | -2.5432 |
|    | 114->124 | -0.27446 |        |        |        |         |         |
|    | 116->123 | 0.3383   |        |        |        |         |         |
| 32 | 114->123 | -0.27064 | 6.2192 | 199.36 | 0.0003 | -2.2611 | -2.767  |
|    | 114->124 | 0.23993  |        |        |        |         |         |
|    | 116->123 | 0.25839  |        |        |        |         |         |
|    | 116->124 | 0.32632  |        |        |        |         |         |
|    | 117->124 | -0.23538 |        |        |        |         |         |
| 33 | 103->122 | 0.61919  | 6.2674 | 197.82 | 0.0153 | -7.5845 | -8.1084 |
| 34 | 102->122 | 0.58117  | 6.3298 | 195.87 | 0.0008 | 0.7708  | 1.3071  |
| 35 | 102->122 | -0.31853 | 6.3613 | 194.90 | 0.0015 | 1.913   | 2.3325  |
|    | 116->125 | 0.3646   |        |        |        |         |         |
|    | 117->125 | -0.35503 |        |        |        |         |         |
|    | 118->125 | 0.23647  |        |        |        |         |         |
| 36 | 101->122 | 0.35493  | 6.4296 | 192.83 | 0.0189 | -0.5843 | -0.6076 |
|    | 118->125 | -0.26568 |        |        |        |         |         |
|    | 119->125 | 0.46395  |        |        |        |         |         |

<sup>a</sup>Number of the excited states; <sup>b</sup>Only transitions with contribution over 10.0% were listed; <sup>c</sup>Configuration-interaction coefficient; <sup>d</sup>Excitation energy; <sup>e</sup>Wavelength; <sup>f</sup>Oscillator strength; <sup>g</sup>Rotatory strength in velocity form ( $10^{-40}$  cgs); <sup>h</sup>Rotatory strength in length form ( $10^{-40}$  cgs).

**Table S12.** Key transitions, oscillator strengths, and rotatory strengths in the ECD spectrum of conformer **2-2** at the PBE1PBE/6-311G(d) level of theory in MeOH with IEFPCM solvent model.

| <i>Num<sup>a</sup></i> | <i>Transition<sub>b</sub></i> | <i>CI-coeff<sup>c</sup></i> | <i>ΔE (eV)<sup>d</sup></i> | <i>λ (nm)<sup>e</sup></i> | <i>f<sup>f</sup></i> | <i>R<sub>vel</sub><sup>g</sup></i> | <i>R<sub>len</sub><sup>h</sup></i> |
|------------------------|-------------------------------|-----------------------------|----------------------------|---------------------------|----------------------|------------------------------------|------------------------------------|
| 1                      | 121->122                      | 0.68663                     | 2.6604                     | 466.04                    | 0.0246               | -3.5571                            | -4.2761                            |
| 2                      | 120->122                      | 0.68823                     | 2.9742                     | 416.87                    | 0.1546               | 10.0062                            | 9.7151                             |
| 3                      | 116->122                      | 0.47565                     | 3.0914                     | 401.06                    | 0.0002               | -8.217                             | -8.8199                            |
|                        | 117->122                      | 0.44279                     |                            |                           |                      |                                    |                                    |
| 4                      | 114->122                      | 0.46367                     | 3.5004                     | 354.20                    | 0.0045               | 0.1583                             | -0.242                             |
|                        | 115->122                      | 0.32848                     |                            |                           |                      |                                    |                                    |
|                        | 119->122                      | 0.33551                     |                            |                           |                      |                                    |                                    |
| 5                      | 114->122                      | -0.29329                    | 3.5456                     | 349.68                    | 0.0118               | 3.1307                             | 3.2414                             |
|                        | 119->122                      | 0.58053                     |                            |                           |                      |                                    |                                    |
| 6                      | 118->122                      | 0.65173                     | 3.7422                     | 331.31                    | 0.1075               | 13.6964                            | 14.7275                            |
| 7                      | 116->122                      | -0.47292                    | 3.9861                     | 311.04                    | 0.0495               | -6.9681                            | -7.435                             |
|                        | 117->122                      | 0.48608                     |                            |                           |                      |                                    |                                    |
| 8                      | 114->122                      | -0.34329                    | 4.2884                     | 289.12                    | 0.0042               | -1.2711                            | -1.7693                            |
|                        | 115->122                      | 0.5933                      |                            |                           |                      |                                    |                                    |
| 9                      | 118->123                      | 0.26878                     | 4.4029                     | 281.60                    | 0.0001               | -3.5782                            | -4.7897                            |
|                        | 119->123                      | 0.4746                      |                            |                           |                      |                                    |                                    |
|                        | 119->124                      | 0.24828                     |                            |                           |                      |                                    |                                    |
| 10                     | 113->122                      | 0.67632                     | 4.7522                     | 260.90                    | 0.0085               | -1.6468                            | -1.5172                            |
| 11                     | 112->122                      | 0.68145                     | 4.8422                     | 256.05                    | 0.0032               | -3.3963                            | -3.6721                            |
| 12                     | 111->122                      | 0.67923                     | 4.9762                     | 249.15                    | 0.0062               | 1.3888                             | 1.273                              |
| 13                     | 121->123                      | 0.50861                     | 5.0299                     | 246.49                    | 0.2646               | 20.4777                            | 22.0686                            |
|                        | 121->124                      | -0.28275                    |                            |                           |                      |                                    |                                    |
| 14                     | 110->122                      | 0.3763                      | 5.1526                     | 240.62                    | 0.0166               | 14.1345                            | 14.1192                            |

|    |          |          |        |        |        |          |          |
|----|----------|----------|--------|--------|--------|----------|----------|
|    | 121->123 | 0.41124  |        |        |        |          |          |
| 15 | 110->122 | -0.31778 | 5.2143 | 237.78 | 0.1363 | -25.9367 | -27.1071 |
|    | 121->124 | 0.52488  |        |        |        |          |          |
| 16 | 110->122 | -0.40924 | 5.2962 | 234.10 | 0.0214 | -5.6349  | -5.6522  |
|    | 120->123 | 0.43042  |        |        |        |          |          |
|    | 120->124 | -0.26445 |        |        |        |          |          |
| 17 | 109->122 | 0.65196  | 5.3775 | 230.56 | 0.0015 | 4.0493   | 4.177    |
| 18 | 120->123 | 0.45265  | 5.4429 | 227.79 | 0.0273 | -0.3792  | -0.496   |
|    | 120->124 | 0.47027  |        |        |        |          |          |
| 19 | 105->122 | -0.2309  | 5.5447 | 223.61 | 0.0039 | -7.6146  | -7.6964  |
|    | 108->122 | 0.62939  |        |        |        |          |          |
| 20 | 107->122 | 0.64642  | 5.6188 | 220.66 | 0.0041 | 4.949    | 5.354    |
| 21 | 118->123 | 0.44719  | 5.6879 | 217.98 | 0.0288 | -3.671   | -3.8091  |
|    | 119->123 | -0.37215 |        |        |        |          |          |
| 22 | 118->124 | -0.24536 | 5.7176 | 216.85 | 0.5383 | 10.8819  | 11.261   |
|    | 120->124 | -0.26781 |        |        |        |          |          |
|    | 120->125 | 0.41944  |        |        |        |          |          |
|    | 121->125 | 0.28627  |        |        |        |          |          |
| 23 | 116->123 | -0.28089 | 5.7692 | 214.91 | 0.0188 | -6.013   | -6.1149  |
|    | 116->124 | 0.30578  |        |        |        |          |          |
|    | 117->123 | -0.29469 |        |        |        |          |          |
|    | 117->124 | 0.33307  |        |        |        |          |          |
| 24 | 105->122 | 0.5358   | 5.8123 | 213.31 | 0.0034 | -3.3428  | -3.6316  |
|    | 108->122 | 0.22367  |        |        |        |          |          |
| 25 | 116->123 | -0.27981 | 5.8767 | 210.98 | 0.0280 | -1.5892  | -0.4702  |
|    | 117->123 | 0.3654   |        |        |        |          |          |
|    | 118->123 | -0.35528 |        |        |        |          |          |
|    | 120->125 | 0.25266  |        |        |        |          |          |
| 26 | 120->125 | -0.35684 | 5.9118 | 209.72 | 0.2361 | 10.0891  | 9.1014   |
|    | 121->125 | 0.49238  |        |        |        |          |          |
| 27 | 118->124 | 0.28713  | 6.0198 | 205.96 | 0.0055 | -0.5177  | -0.4576  |
|    | 119->123 | -0.24446 |        |        |        |          |          |
|    | 119->124 | 0.53916  |        |        |        |          |          |
| 28 | 118->124 | 0.50894  | 6.0421 | 205.20 | 0.0391 | 17.5551  | 18.0128  |
|    | 119->124 | -0.30825 |        |        |        |          |          |
| 29 | 104->122 | 0.41924  | 6.0847 | 203.76 | 0.0013 | -5.8544  | -5.8334  |
|    | 106->122 | -0.39633 |        |        |        |          |          |
| 30 | 103->122 | 0.24765  | 6.1483 | 201.66 | 0.0044 | -1.601   | -1.4882  |
|    | 104->122 | 0.37338  |        |        |        |          |          |
|    | 106->122 | 0.48731  |        |        |        |          |          |
| 31 | 104->122 | -0.24476 | 6.1795 | 200.64 | 0.0006 | -4.1105  | -4.08    |
|    | 114->124 | -0.27655 |        |        |        |          |          |
|    | 116->123 | 0.33439  |        |        |        |          |          |
|    | 117->123 | 0.22369  |        |        |        |          |          |
| 32 | 114->123 | -0.26238 | 6.2199 | 199.33 | 0.0010 | -4.2474  | -4.9206  |
|    | 114->124 | 0.23328  |        |        |        |          |          |
|    | 116->123 | 0.25895  |        |        |        |          |          |
|    | 116->124 | 0.31813  |        |        |        |          |          |
|    | 117->124 | 0.23798  |        |        |        |          |          |
| 33 | 103->122 | 0.61016  | 6.2716 | 197.69 | 0.0192 | 2.6491   | 2.6794   |
| 34 | 102->122 | 0.6383   | 6.3161 | 196.30 | 0.0016 | 1.725    | 1.5928   |
| 35 | 116->125 | 0.40813  | 6.3509 | 195.22 | 0.0003 | 0.3713   | 1.2326   |
|    | 117->125 | 0.38972  |        |        |        |          |          |
|    | 118->125 | 0.31193  |        |        |        |          |          |
| 36 | 101->122 | 0.34846  | 6.4320 | 192.76 | 0.0109 | -1.2113  | -1.2832  |

|  |          |         |  |  |  |  |
|--|----------|---------|--|--|--|--|
|  | 119->125 | 0.56026 |  |  |  |  |
|--|----------|---------|--|--|--|--|

<sup>a</sup>Number of the excited states; <sup>b</sup>Only transitions with contribution over 10.0% were listed; <sup>c</sup>Configuration-interaction coefficient; <sup>d</sup>Excitation energy; <sup>e</sup>Wavelength; <sup>f</sup>Oscillator strength; <sup>g</sup>Rotatory strength in velocity form ( $10^{-40}$  cgs); <sup>h</sup>Rotatory strength in length form ( $10^{-40}$  cgs).

**Table S13.** Gibbs free energies of the species in the processes from VI and IX to XI through intermediates Xa to Xd.

|                             | E            | Thermal correction to Gibbs Free Energy | G (hartree)  | $\Delta G$ (hartree) | $\Delta G$ (kcal/mol) |
|-----------------------------|--------------|-----------------------------------------|--------------|----------------------|-----------------------|
| 1# VI                       | -688.144691  | 0.148769                                | -687.995922  | 0.00                 | 0.00                  |
| 2# IXa                      | -879.061875  | 0.188848                                | -878.873027  |                      |                       |
| 3# IXa_lostH                | -878.602390  | 0.173367                                | -878.429023  |                      |                       |
| 4# Xa_1_TS11                | -1566.753005 | 0.350424                                | -1566.402581 | 0.022364             | 14.03                 |
| 5# Xa_1_TS11_I1             | -1566.759252 | 0.352418                                | -1566.406834 | 0.018111             | 11.36                 |
| 6# Xb_addH_1                | -1567.234347 | 0.365264                                | -1566.869083 | -0.066905            | -41.98                |
| 7# Xb_addH_lostH_1          | -1566.782049 | 0.350423                                | -1566.431626 | -0.006681            | -4.19                 |
| 8# Xc_addH_lostH_TS_31      | -1566.744447 | 0.351023                                | -1566.393424 | 0.031521             | 19.78                 |
| 9# Xc_addH_lostH_P_1        | -1566.747137 | 0.352041                                | -1566.395096 | 0.029849             | 18.73                 |
| 10a# XI_addH_lostH_P_1_P_R1 | -1567.238797 | 0.367665                                | -1566.871132 | -0.068954            | -43.27                |
| 10b# XI_addH_lostH_P_1_P_S1 | -1567.236629 | 0.369460                                | -1566.867169 | -0.064991            | -40.78                |

1#

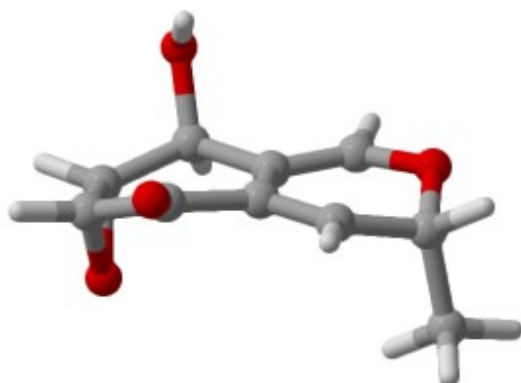

|   |             |             |             |
|---|-------------|-------------|-------------|
| C | -2.33196800 | -0.45113100 | 0.61500300  |
| C | -1.27763500 | -1.46128700 | 0.19975500  |
| C | 0.07563300  | -0.82586100 | -0.00755100 |
| C | 0.22068800  | 0.59969400  | -0.31988300 |

|   |             |             |             |
|---|-------------|-------------|-------------|
| C | -0.98080000 | 1.46894500  | -0.45161700 |
| C | -2.20651300 | 0.98202700  | 0.26215700  |
| H | 1.15812200  | -2.67708500 | -0.07588900 |
| C | 1.17704600  | -1.59329800 | -0.13562800 |
| C | 1.44741200  | 1.12204000  | -0.50378600 |
| C | 2.66427700  | 0.28923400  | -0.22090700 |
| H | 1.56538200  | 2.16488300  | -0.77871300 |
| O | -0.99079000 | 2.52097300  | -1.07049500 |
| O | -1.96638700 | 0.50061400  | 1.60385100  |
| O | -1.75557200 | -2.17053400 | -0.95180500 |
| H | -1.61232300 | -1.59801700 | -1.71842700 |
| H | -1.21339600 | -2.22548000 | 0.98167500  |
| H | -3.33714300 | -0.86222100 | 0.70683400  |
| H | -3.09262700 | 1.59993800  | 0.13496200  |
| O | 2.40448300  | -1.12681600 | -0.44847900 |
| C | 3.15993200  | 0.48262200  | 1.21381700  |
| H | 3.44071400  | 1.52781300  | 1.37583800  |
| H | 2.36864600  | 0.22528100  | 1.92303700  |
| H | 4.03127000  | -0.15079800 | 1.40205100  |
| H | 3.46904300  | 0.52388500  | -0.92410400 |

-----  
2#

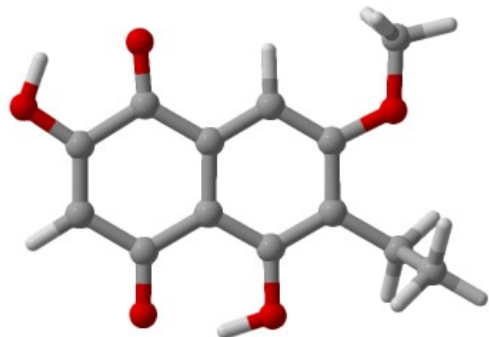

|   |             |             |             |
|---|-------------|-------------|-------------|
| C | -3.23730100 | 0.27563400  | 0.11083700  |
| C | -2.06989900 | 1.21617800  | 0.07615800  |
| C | -0.72316700 | 0.64191800  | -0.03278800 |
| C | -0.57547800 | -0.75799200 | -0.10087500 |
| C | -1.74421700 | -1.64835800 | -0.06041200 |
| C | -3.07723900 | -1.06527000 | 0.04606100  |
| H | 0.20919900  | 2.55535700  | -0.00347100 |
| C | 0.37810600  | 1.48904300  | -0.06413200 |
| C | 0.72817500  | -1.29542500 | -0.20523600 |
| H | -3.92110100 | -1.74424700 | 0.07221600  |
| C | 1.85876200  | -0.45245700 | -0.25375900 |
| C | 1.66402800  | 0.93409500  | -0.16627900 |
| O | -1.60662100 | -2.88910700 | -0.11512200 |
| O | -2.31932200 | 2.42112800  | 0.14180900  |

|   |             |             |             |
|---|-------------|-------------|-------------|
| O | -4.41938100 | 0.88716700  | 0.21028600  |
| H | -4.20555600 | 1.84483400  | 0.23653900  |
| O | 0.93120200  | -2.61704700 | -0.26128200 |
| H | 0.02570000  | -3.03562400 | -0.22235000 |
| O | 2.79716800  | 1.68453600  | -0.18730200 |
| C | 2.67548900  | 3.10023000  | -0.12618600 |
| H | 3.69366500  | 3.48725300  | -0.16539800 |
| H | 2.10411500  | 3.49018500  | -0.97648700 |
| H | 2.19959000  | 3.42108400  | 0.80768000  |
| C | 3.23957600  | -1.04468100 | -0.34389600 |
| H | 3.88468900  | -0.36237300 | -0.90315400 |
| H | 3.18078100  | -1.98606200 | -0.89537600 |
| C | 3.84513500  | -1.30274100 | 1.04684500  |
| H | 3.92483000  | -0.37015100 | 1.61290600  |
| H | 3.22161700  | -1.99923000 | 1.61428300  |
| H | 4.84628500  | -1.73548000 | 0.95746400  |

-----  
3#

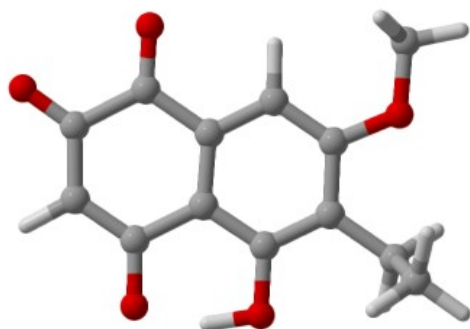

|   |             |             |             |
|---|-------------|-------------|-------------|
| C | -3.33733700 | 0.38592700  | 0.12203900  |
| C | -2.09348700 | 1.31126400  | 0.08733400  |
| C | -0.74277900 | 0.68213400  | -0.02681400 |
| C | -0.62688100 | -0.70993500 | -0.09848300 |
| C | -1.82763400 | -1.59234500 | -0.06037000 |
| C | -3.09747800 | -1.01213000 | 0.04406600  |
| H | 0.22636800  | 2.57433000  | 0.00939300  |
| C | 0.38464900  | 1.50618500  | -0.05659400 |
| C | 0.66423500  | -1.28274000 | -0.20464900 |
| H | -3.95578300 | -1.67636200 | 0.06843000  |
| C | 1.81234100  | -0.46622600 | -0.25189800 |
| C | 1.64869600  | 0.92412900  | -0.16126100 |
| O | -1.62877700 | -2.85913600 | -0.12759300 |
| O | -2.21746300 | 2.52730000  | 0.15211600  |
| O | -4.44891900 | 0.93170000  | 0.21580700  |
| O | 0.81195900  | -2.61393800 | -0.26226300 |
| H | -0.17599800 | -2.95327200 | -0.21915400 |
| O | 2.81826500  | 1.65693500  | -0.18268300 |

|   |            |             |             |
|---|------------|-------------|-------------|
| C | 2.70315300 | 3.06295500  | -0.11921500 |
| H | 3.72237900 | 3.45458700  | -0.15697500 |
| H | 2.12897900 | 3.46494000  | -0.96451700 |
| H | 2.22345400 | 3.39223700  | 0.81201700  |
| C | 3.17539300 | -1.10035700 | -0.34916100 |
| H | 3.85618100 | -0.42564600 | -0.87672800 |
| H | 3.08544100 | -2.02118400 | -0.93295000 |
| C | 3.75610600 | -1.43898700 | 1.03341400  |
| H | 3.86183500 | -0.53258500 | 1.63808900  |
| H | 3.09028300 | -2.12796300 | 1.56086500  |
| H | 4.74246600 | -1.91121900 | 0.94799600  |

4#

Imaginary frequency : -437.2350 cm<sup>-1</sup>

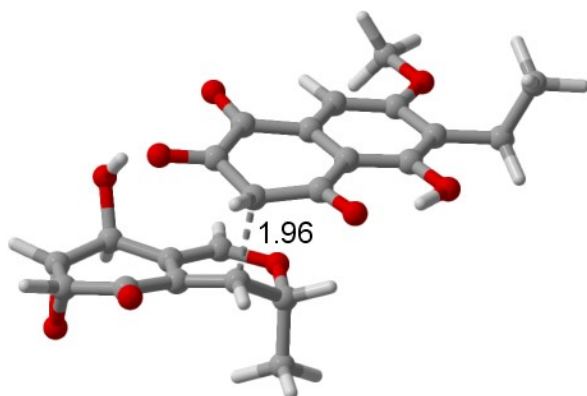

|   |            |             |             |
|---|------------|-------------|-------------|
| C | 4.77768700 | 1.38609300  | 0.22587600  |
| C | 3.37491100 | 1.78617100  | 0.65251400  |
| C | 2.47904000 | 0.58085700  | 0.89727500  |
| C | 2.77834600 | -0.70685100 | 0.32171900  |
| C | 3.97634200 | -0.98233400 | -0.41951100 |
| C | 5.06899600 | 0.04894100  | -0.31290400 |
| H | 0.90952400 | 1.74980800  | 1.79051400  |
| C | 1.26407300 | 0.77724100  | 1.47037000  |
| C | 1.69430100 | -1.61850600 | 0.26669900  |
| C | 0.75387100 | -1.55441900 | 1.45839300  |
| H | 1.94557900 | -2.63071400 | -0.03770500 |
| O | 4.16079600 | -1.99374100 | -1.11514500 |
| O | 5.46884000 | 0.42874400  | 1.03209300  |
| O | 2.84945300 | 2.70333500  | -0.29723300 |
| H | 2.47970800 | 2.17743400  | -1.03924700 |
| H | 3.46974300 | 2.35553200  | 1.58749200  |
| H | 5.38014600 | 2.23042400  | -0.11383800 |
| H | 5.89368200 | -0.09679700 | -1.00941700 |
| O | 0.34298300 | -0.20144500 | 1.73912000  |
| C | 1.40704300 | -2.15238600 | 2.70615400  |
| H | 1.66144600 | -3.20363500 | 2.53502400  |
| H | 2.32465400 | -1.61025500 | 2.94653500  |

|   |             |             |             |
|---|-------------|-------------|-------------|
| H | 0.71823500  | -2.08938000 | 3.55455800  |
| H | -0.17665400 | -2.08991000 | 1.25290700  |
| C | 0.88806000  | 0.26860900  | -1.56753400 |
| C | -0.19209400 | 1.25004400  | -1.19020800 |
| C | -1.48215900 | 0.68983200  | -0.67472200 |
| C | -1.71757000 | -0.69623100 | -0.66582500 |
| C | -0.68332100 | -1.64140900 | -1.11082700 |
| C | 0.67167800  | -1.14858300 | -1.33771200 |
| H | -2.22679800 | 2.63294200  | -0.28863300 |
| C | -2.45654700 | 1.57716500  | -0.23989700 |
| C | -2.97073300 | -1.17530900 | -0.21427300 |
| H | 1.27496100  | -1.78232300 | -1.98274800 |
| C | -3.95719100 | -0.29224700 | 0.26090800  |
| C | -3.68019300 | 1.08131300  | 0.22872000  |
| O | -0.94386900 | -2.86967400 | -1.19840600 |
| O | -0.05859800 | 2.45637300  | -1.38116400 |
| O | 1.98036200  | 0.67845000  | -2.00590800 |
| O | -3.24661800 | -2.49240700 | -0.22370800 |
| H | -2.42490300 | -2.92022900 | -0.61763100 |
| O | -4.69085600 | 1.89196900  | 0.67652800  |
| C | -4.45246000 | 3.28849200  | 0.70750200  |
| H | -5.35960300 | 3.73937400  | 1.11418900  |
| H | -3.60037300 | 3.53920900  | 1.35086700  |
| H | -4.26575400 | 3.69022800  | -0.29601900 |
| C | -5.28535300 | -0.82079700 | 0.73695800  |
| H | -5.66672900 | -0.17258300 | 1.53122900  |
| H | -5.13237000 | -1.81795500 | 1.15870200  |
| C | -6.31899800 | -0.90299200 | -0.39800000 |
| H | -6.49587400 | 0.08741900  | -0.82861500 |
| H | -5.95870500 | -1.56281300 | -1.19264000 |
| H | -7.27624300 | -1.29477800 | -0.03497300 |

-----  
5#

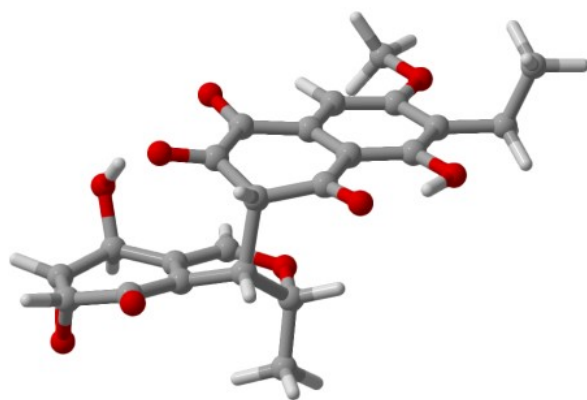

|   |            |            |            |
|---|------------|------------|------------|
| C | 4.75008200 | 1.43326300 | 0.26678900 |
| C | 3.31847400 | 1.79978300 | 0.62273900 |
| C | 2.43585900 | 0.57118800 | 0.79208200 |



|   |             |             |             |
|---|-------------|-------------|-------------|
| C | 2.78598000  | -0.67505400 | 0.22414700  |
| C | 4.03669500  | -0.95799500 | -0.39644100 |
| C | 5.10296000  | 0.09539400  | -0.23150800 |
| H | 0.77749800  | 1.68632300  | 1.63037000  |
| C | 1.16912500  | 0.72885800  | 1.31079600  |
| C | 1.64614100  | -1.60362000 | 0.07722600  |
| C | 0.83013200  | -1.62521200 | 1.37799600  |
| H | 1.98726200  | -2.61118500 | -0.16233800 |
| O | 4.29001600  | -1.98309400 | -1.05638600 |
| O | 5.42095000  | 0.50702200  | 1.12590800  |
| O | 2.81714400  | 2.72562000  | -0.33018500 |
| H | 2.45034000  | 2.21515600  | -1.08275300 |
| H | 3.35294300  | 2.34619200  | 1.57556600  |
| H | 5.34552900  | 2.29082900  | -0.05159200 |
| H | 5.96899200  | -0.04004200 | -0.87852000 |
| O | 0.34310300  | -0.30321000 | 1.68083300  |
| C | 1.63299800  | -2.16937800 | 2.55637600  |
| H | 1.92183200  | -3.20853000 | 2.36571700  |
| H | 2.54188000  | -1.58285100 | 2.70568200  |
| H | 1.02755200  | -2.13453500 | 3.46726600  |
| H | -0.07392700 | -2.22922000 | 1.25981900  |
| C | 0.87060800  | 0.32079100  | -1.50298200 |
| C | -0.20065300 | 1.27904600  | -1.11423900 |
| C | -1.47761100 | 0.68863900  | -0.60420300 |
| C | -1.71290100 | -0.70358100 | -0.60934200 |
| C | -0.67840900 | -1.64084600 | -1.02759500 |
| C | 0.72725200  | -1.14511400 | -1.20965300 |
| H | -2.24718600 | 2.61975000  | -0.23079400 |
| C | -2.46997500 | 1.56245400  | -0.18241900 |
| C | -2.97960100 | -1.19022500 | -0.18883300 |
| H | 1.19166100  | -1.68970400 | -2.03497000 |
| C | -3.97507500 | -0.31879600 | 0.27837600  |
| C | -3.69731600 | 1.05700600  | 0.26264900  |
| O | -0.91866900 | -2.86121900 | -1.15811200 |
| O | -0.10824500 | 2.49357000  | -1.32827800 |
| O | 1.91458000  | 0.70478600  | -2.05467100 |
| O | -3.25450200 | -2.50748100 | -0.22262600 |
| H | -2.43466000 | -2.93504700 | -0.60598400 |
| O | -4.71667300 | 1.85892900  | 0.69920300  |
| C | -4.48855300 | 3.25816300  | 0.73855400  |
| H | -5.40478400 | 3.70011900  | 1.13422000  |
| H | -3.64729300 | 3.51127000  | 1.39453800  |
| H | -4.29050500 | 3.66359000  | -0.26087700 |
| C | -5.31311300 | -0.85075500 | 0.72274300  |
| H | -5.69985400 | -0.22100200 | 1.52938900  |
| H | -5.17303700 | -1.85917900 | 1.12138000  |
| C | -6.33439500 | -0.89484200 | -0.42537100 |
| H | -6.49811800 | 0.10790600  | -0.83179900 |

|   |             |             |             |
|---|-------------|-------------|-------------|
| H | -5.97096300 | -1.53647200 | -1.23349000 |
| H | -7.29901600 | -1.28773900 | -0.08364400 |

-----  
6#

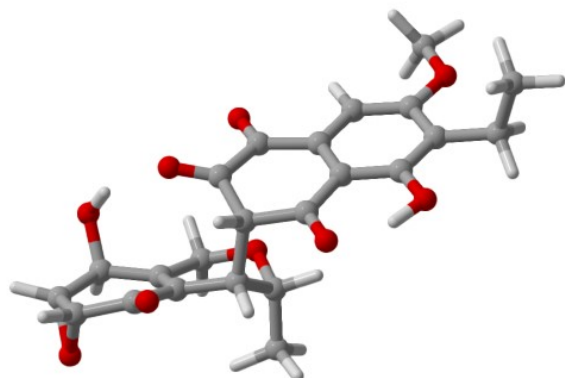

|   |             |             |             |
|---|-------------|-------------|-------------|
| C | 5.45121300  | 0.59576700  | -0.32875200 |
| C | 4.32666800  | 1.45757400  | 0.20699000  |
| C | 3.11935800  | 0.66927600  | 0.65410000  |
| C | 2.86982700  | -0.59652200 | 0.26351800  |
| C | 3.81304200  | -1.35040900 | -0.58677700 |
| C | 5.20098600  | -0.80473200 | -0.72229000 |
| H | 2.50271900  | 1.68461400  | 2.42654700  |
| C | 2.09933500  | 1.46456900  | 1.42400400  |
| C | 1.51172600  | -1.20521100 | 0.49436700  |
| C | 0.86086800  | -0.57237100 | 1.72613400  |
| H | 1.59623500  | -2.28871700 | 0.60863800  |
| O | 3.47594100  | -2.36516300 | -1.18383900 |
| O | 5.86720400  | -0.47128700 | 0.51523800  |
| O | 3.92867500  | 2.42781100  | -0.75616600 |
| H | 3.29672000  | 2.00699900  | -1.36412900 |
| H | 4.72353800  | 2.03045800  | 1.05618400  |
| H | 6.24695800  | 1.14814500  | -0.82764700 |
| H | 5.81748300  | -1.29810400 | -1.46996800 |
| O | 0.82318900  | 0.84842400  | 1.52149900  |
| C | 1.53104200  | -0.96871800 | 3.03900400  |
| H | 1.38692400  | -2.03789200 | 3.21895100  |
| H | 2.60635700  | -0.77398600 | 3.02734400  |
| H | 1.08015700  | -0.41588900 | 3.86716800  |
| H | -0.19412000 | -0.85303700 | 1.77882000  |
| C | 0.65246600  | 0.44963100  | -1.24313900 |
| C | -0.51839900 | 1.36379100  | -0.85252100 |
| C | -1.78676000 | 0.70233500  | -0.46488400 |
| C | -1.88940200 | -0.70967800 | -0.38246900 |
| C | -0.74540700 | -1.58487300 | -0.58163800 |
| C | 0.63189900  | -0.99793500 | -0.81140800 |
| H | -2.75398000 | 2.58059800  | -0.31503000 |

|   |             |             |             |
|---|-------------|-------------|-------------|
| C | -2.88690400 | 1.51101200  | -0.22876600 |
| C | -3.15534300 | -1.27676300 | -0.05446000 |
| H | 1.13279200  | -1.59241400 | -1.58039500 |
| C | -4.27236600 | -0.46512900 | 0.20472400  |
| C | -4.12073600 | 0.92749400  | 0.10034200  |
| O | -0.84112000 | -2.82342700 | -0.51375700 |
| O | -0.38123500 | 2.57202600  | -0.91792400 |
| O | 1.59521400  | 0.91431600  | -1.85922900 |
| O | -3.31844500 | -2.60243700 | 0.02523400  |
| H | -2.42949500 | -3.00763000 | -0.17081700 |
| O | -5.24162300 | 1.65139900  | 0.33474000  |
| C | -5.16467100 | 3.07241100  | 0.26665400  |
| H | -6.16674300 | 3.43304300  | 0.49760200  |
| H | -4.45416200 | 3.46827600  | 1.00056800  |
| H | -4.87695200 | 3.40775800  | -0.73579600 |
| C | -5.60410000 | -1.08557600 | 0.53482400  |
| H | -6.14743700 | -0.42243800 | 1.21267900  |
| H | -5.43017400 | -2.03148900 | 1.05329200  |
| C | -6.44925900 | -1.33940100 | -0.72524400 |
| H | -6.64653900 | -0.40248800 | -1.25415400 |
| H | -5.92912000 | -2.01775500 | -1.40732100 |
| H | -7.41013600 | -1.79152700 | -0.46105200 |
| H | 1.93608300  | 2.42092100  | 0.91827900  |

-----  
7#

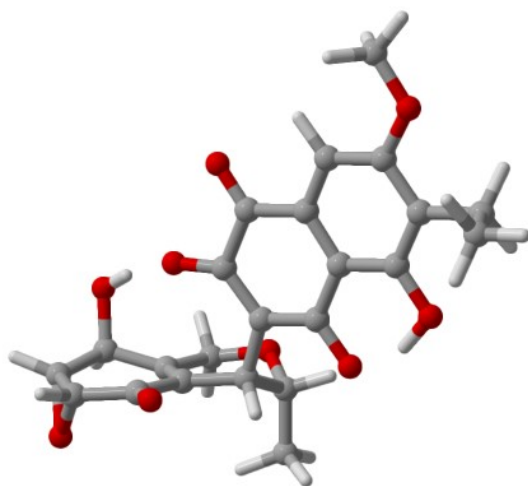

|   |            |             |             |
|---|------------|-------------|-------------|
| C | 5.16933500 | 1.38682100  | -0.86114000 |
| C | 4.72047200 | 1.07446300  | 0.54889000  |
| C | 3.77557300 | -0.09743600 | 0.63997900  |
| C | 2.95014100 | -0.44098800 | -0.36518500 |
| C | 3.13586300 | 0.08477900  | -1.72924400 |
| C | 4.36619400 | 0.90854900  | -1.99386900 |
| H | 4.45250500 | -1.26441300 | 2.28067600  |
| C | 3.57862400 | -0.62955700 | 2.03131300  |

|   |              |              |              |
|---|--------------|--------------|--------------|
| C | 1. 71729400  | -1. 26270500 | -0. 10464000 |
| C | 1. 93207900  | -2. 13072000 | 1. 15170000  |
| H | 1. 55335100  | -1. 94028400 | -0. 94923200 |
| O | 2. 34651400  | -0. 12840600 | -2. 64119400 |
| O | 5. 63590000  | 0. 29404800  | -1. 65326600 |
| O | 4. 05585800  | 2. 20903000  | 1. 09478000  |
| H | 3. 12045100  | 2. 15643900  | 0. 78287500  |
| H | 5. 61173700  | 0. 90247300  | 1. 17037100  |
| H | 5. 72654000  | 2. 31837700  | -0. 96554000 |
| H | 4. 35450100  | 1. 44286800  | -2. 94186300 |
| O | 2. 36935300  | -1. 32004600 | 2. 25273500  |
| C | 2. 87824200  | -3. 30535200 | 0. 89751000  |
| H | 2. 41918400  | -3. 99890400 | 0. 18658500  |
| H | 3. 83217800  | -2. 97323600 | 0. 47513500  |
| H | 3. 07664900  | -3. 84212300 | 1. 83074000  |
| H | 0. 96446300  | -2. 51852300 | 1. 47047100  |
| C | 0. 48230400  | 1. 01432800  | 0. 17128800  |
| C | -0. 87826500 | 1. 73813400  | 0. 31908700  |
| C | -2. 13660100 | 0. 95085600  | 0. 21284500  |
| C | -2. 06234600 | -0. 42973200 | 0. 01372400  |
| C | -0. 75226000 | -1. 11514400 | -0. 09159800 |
| C | 0. 46622700  | -0. 39479800 | 0. 01122800  |
| H | -3. 34808000 | 2. 67853500  | 0. 46561500  |
| C | -3. 36212000 | 1. 60747200  | 0. 31595100  |
| C | -3. 26616800 | -1. 16862100 | -0. 08427600 |
| C | -4. 51545600 | -0. 52750400 | 0. 03039900  |
| C | -4. 53968500 | 0. 86286000  | 0. 21504500  |
| O | -0. 76360300 | -2. 38217700 | -0. 26756000 |
| O | -0. 90529500 | 2. 94423200  | 0. 51715400  |
| O | 1. 47726200  | 1. 77787200  | 0. 19703900  |
| O | -3. 24337800 | -2. 49566200 | -0. 28665600 |
| H | -2. 24218100 | -2. 71038000 | -0. 31924600 |
| O | -5. 79434100 | 1. 42421200  | 0. 28704300  |
| C | -5. 87328900 | 2. 82033800  | 0. 49678100  |
| H | -6. 93763400 | 3. 06239100  | 0. 53083500  |
| H | -5. 40310500 | 3. 11743900  | 1. 44311900  |
| H | -5. 39991500 | 3. 38204100  | -0. 31881000 |
| C | -5. 78390200 | -1. 33086200 | -0. 09376200 |
| H | -6. 56946800 | -0. 86503600 | 0. 50827200  |
| H | -5. 59865200 | -2. 33288400 | 0. 30346500  |
| C | -6. 25495400 | -1. 44666700 | -1. 55264200 |
| H | -6. 45465000 | -0. 45550600 | -1. 97179000 |
| H | -5. 48359300 | -1. 92740400 | -2. 16096500 |
| H | -7. 17263200 | -2. 04201100 | -1. 62790200 |
| H | 3. 58838800  | 0. 21421700  | 2. 73028200  |

-----  
8#

Imaginary frequency : -283.9031 cm<sup>-1</sup>

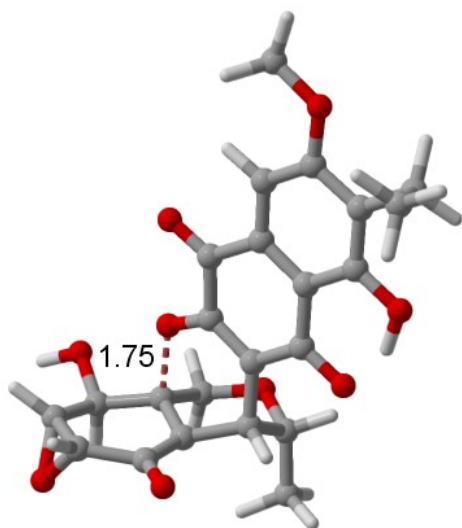

|   |             |             |             |
|---|-------------|-------------|-------------|
| C | -4.20551700 | 1.77031700  | 1.31484900  |
| C | -4.21692200 | 1.37876500  | -0.15631100 |
| C | -3.15682300 | 0.34974700  | -0.51061800 |
| C | -2.85931200 | -0.65136800 | 0.45459700  |
| C | -2.98305400 | -0.45044000 | 1.85146200  |
| C | -3.66567700 | 0.82946800  | 2.30157400  |
| H | -4.36701000 | -0.53476800 | -2.01744600 |
| C | -3.33530900 | -0.14647900 | -1.94609500 |
| C | -1.77727600 | -1.57659000 | -0.05749600 |
| C | -2.16795200 | -2.18122900 | -1.41428500 |
| H | -1.58683000 | -2.37555400 | 0.66150200  |
| O | -2.53134100 | -1.19856500 | 2.74361500  |
| O | -5.09848000 | 0.99996600  | 2.13166500  |
| O | -4.10920300 | 2.50679600  | -1.02293100 |
| H | -4.89660600 | 3.04428100  | -0.87022400 |
| H | -5.17771000 | 0.86514900  | -0.32235500 |
| H | -4.19110700 | 2.84497200  | 1.51086300  |
| H | -3.29379900 | 1.19430700  | 3.25912600  |
| O | -2.40003600 | -1.12192400 | -2.36150000 |
| C | -3.36454300 | -3.12448500 | -1.31029900 |
| H | -4.19069800 | -2.64034200 | -0.78166600 |
| H | -3.70043500 | -3.43111100 | -2.30622700 |
| H | -3.08614300 | -4.01833000 | -0.74252700 |
| H | -1.31066500 | -2.71968500 | -1.83126100 |
| C | -0.61640800 | 0.62892900  | -0.46598200 |
| C | 0.62084000  | 1.49886300  | -0.44526700 |
| C | 1.94169800  | 0.82196800  | -0.29491900 |
| C | 1.99686900  | -0.56157000 | -0.09390800 |
| C | 0.75625000  | -1.36247500 | -0.03260900 |
| C | -0.52511900 | -0.72940600 | -0.18746600 |
| H | 2.99125400  | 2.65737600  | -0.49015400 |
| C | 3.10006800  | 1.59138500  | -0.34398600 |
| C | 3.25968600  | -1.18122400 | 0.05050600  |

|   |             |             |             |
|---|-------------|-------------|-------------|
| C | 4.44616300  | -0.42421000 | -0.01324500 |
| C | 4.34102900  | 0.96182300  | -0.19568600 |
| O | 0.84944000  | -2.61117200 | 0.13913800  |
| O | 0.54323200  | 2.71497800  | -0.56383100 |
| O | -1.70452100 | 1.29429300  | -0.72339300 |
| O | 3.35731300  | -2.50543900 | 0.25294100  |
| H | 2.39625500  | -2.82570500 | 0.25118400  |
| O | 5.53381300  | 1.64244700  | -0.21732800 |
| C | 5.48789900  | 3.04296700  | -0.41690800 |
| H | 6.52502900  | 3.38372400  | -0.40587800 |
| H | 5.03092800  | 3.30149900  | -1.38053100 |
| H | 4.93128800  | 3.54895900  | 0.38193000  |
| C | 5.78166900  | -1.09904600 | 0.16221300  |
| H | 6.53661400  | -0.56479900 | -0.42185400 |
| H | 5.70915800  | -2.11827500 | -0.22712500 |
| C | 6.21423000  | -1.15007500 | 1.63667900  |
| H | 6.30238200  | -0.13911000 | 2.04630600  |
| H | 5.47565200  | -1.69708100 | 2.22950200  |
| H | 7.18289500  | -1.65093500 | 1.74799200  |
| H | -3.23711700 | 0.69058200  | -2.63895200 |

-----  
9#

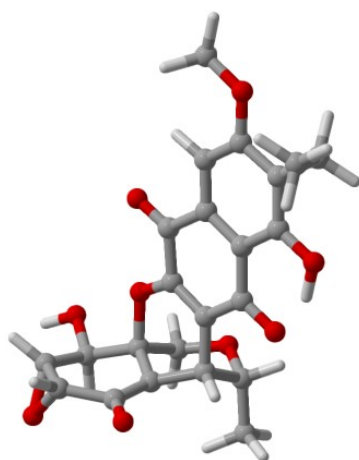

|   |             |             |             |
|---|-------------|-------------|-------------|
| C | -4.13355800 | 1.78963500  | 1.32105000  |
| C | -4.14652100 | 1.41223900  | -0.15398300 |
| C | -3.04444400 | 0.42295200  | -0.52149200 |
| C | -2.85567900 | -0.65979100 | 0.44725300  |
| C | -3.02140300 | -0.49913900 | 1.83477300  |
| C | -3.65209600 | 0.80590900  | 2.29612300  |
| H | -4.31914800 | -0.48486800 | -1.97895600 |
| C | -3.28576300 | -0.10337300 | -1.94829700 |
| C | -1.78983100 | -1.59914100 | -0.06325000 |
| C | -2.16972100 | -2.17634400 | -1.43757600 |
| H | -1.61938300 | -2.40641600 | 0.65178600  |
| O | -2.64491000 | -1.29457900 | 2.72952300  |

|   |             |             |             |
|---|-------------|-------------|-------------|
| O | -5.07412800 | 1.05947100  | 2.12184800  |
| O | -4.06909100 | 2.55139400  | -1.01166800 |
| H | -4.83763900 | 3.09946600  | -0.80869100 |
| H | -5.08890700 | 0.86889600  | -0.31809200 |
| H | -4.06082800 | 2.85990100  | 1.52963600  |
| H | -3.27067400 | 1.13995400  | 3.26150900  |
| O | -2.36587400 | -1.09500600 | -2.36903500 |
| C | -3.38692600 | -3.09434000 | -1.36115400 |
| H | -4.19856600 | -2.60462600 | -0.81588200 |
| H | -3.72947700 | -3.36402700 | -2.36543900 |
| H | -3.12835200 | -4.01023400 | -0.81961600 |
| H | -1.31872400 | -2.72541900 | -1.85501900 |
| C | -0.61722600 | 0.58424900  | -0.42894900 |
| C | 0.59114200  | 1.46601200  | -0.44573400 |
| C | 1.91888000  | 0.80053900  | -0.29568500 |
| C | 1.99422000  | -0.58408600 | -0.09628200 |
| C | 0.76660000  | -1.39835300 | -0.03010000 |
| C | -0.52716600 | -0.76744900 | -0.17782200 |
| H | 2.94513100  | 2.64761400  | -0.48978900 |
| C | 3.06712700  | 1.58317700  | -0.34286500 |
| C | 3.26501100  | -1.18628000 | 0.05178100  |
| C | 4.44165500  | -0.41457000 | -0.01018500 |
| C | 4.31692500  | 0.96974900  | -0.19240800 |
| O | 0.86124400  | -2.64235900 | 0.14014600  |
| O | 0.50201100  | 2.68035700  | -0.59151800 |
| O | -1.74156500 | 1.25106500  | -0.64010000 |
| O | 3.38088800  | -2.50939500 | 0.25404000  |
| H | 2.43084200  | -2.84766700 | 0.25312000  |
| O | 5.49871200  | 1.66644400  | -0.21274300 |
| C | 5.43521200  | 3.06718700  | -0.41121100 |
| H | 6.46799400  | 3.42039200  | -0.39834000 |
| H | 4.97656100  | 3.32020200  | -1.37529300 |
| H | 4.87135300  | 3.56473600  | 0.38759800  |
| C | 5.78651100  | -1.07029300 | 0.16653500  |
| H | 6.53288600  | -0.52784700 | -0.42093000 |
| H | 5.72832700  | -2.09186000 | -0.21888500 |
| C | 6.22199600  | -1.10860700 | 1.64054700  |
| H | 6.29615800  | -0.09475700 | 2.04564900  |
| H | 5.49288300  | -1.66379300 | 2.23749200  |
| H | 7.19802500  | -1.59468400 | 1.75194000  |
| H | -3.19643900 | 0.71660200  | -2.66415600 |

-----  
10a#

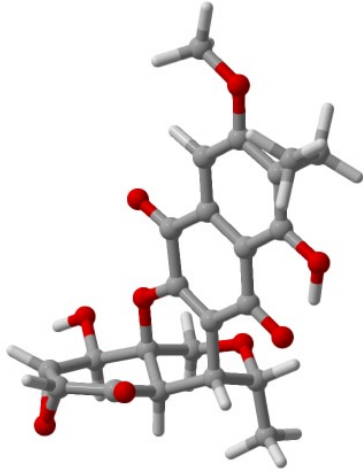

|   |             |             |             |
|---|-------------|-------------|-------------|
| C | -4.17985700 | 1.82921700  | 1.22696100  |
| C | -4.19499600 | 1.35235200  | -0.22336100 |
| C | -3.06190100 | 0.36918100  | -0.53512100 |
| C | -2.93044300 | -0.72383100 | 0.54113100  |
| C | -2.64088900 | -0.11042800 | 1.91170100  |
| C | -3.44390700 | 1.10094500  | 2.28181200  |
| H | -4.31487900 | -0.68981200 | -1.91979100 |
| C | -3.29510100 | -0.27338200 | -1.91548900 |
| C | -1.79871200 | -1.65136600 | 0.08075000  |
| C | -2.14718500 | -2.28620700 | -1.28691900 |
| H | -1.60971400 | -2.43781400 | 0.81273700  |
| O | -1.79468600 | -0.54760700 | 2.66452400  |
| O | -4.87222400 | 0.96538000  | 2.12726700  |
| O | -4.10717200 | 2.42305800  | -1.14377100 |
| H | -4.93471100 | 2.91929800  | -1.10813900 |
| H | -5.13579000 | 0.79403700  | -0.34883700 |
| H | -4.35486700 | 2.89603400  | 1.37080500  |
| H | -3.11381700 | 1.60820400  | 3.18590600  |
| O | -2.33557300 | -1.24942000 | -2.25842100 |
| C | -3.31732800 | -3.26649000 | -1.24131000 |
| H | -4.24740000 | -2.80586900 | -0.89624000 |
| H | -3.49482700 | -3.67351700 | -2.23988700 |
| H | -3.08452600 | -4.09445100 | -0.56526700 |
| H | -1.25939000 | -2.82019000 | -1.63528900 |
| C | -0.67374700 | 0.50319700  | -0.38609500 |
| C | 0.51311400  | 1.40546000  | -0.51093900 |
| C | 1.84468800  | 0.76620100  | -0.33843700 |
| C | 1.94762000  | -0.60922500 | -0.05375300 |
| C | 0.75122500  | -1.43420200 | 0.08561500  |
| C | -0.56289500 | -0.80957400 | -0.06717000 |
| H | 2.84397600  | 2.60746000  | -0.67794000 |
| C | 2.97766100  | 1.55601400  | -0.46378100 |
| C | 3.23409700  | -1.18156900 | 0.09642800  |
| C | 4.39625800  | -0.39801400 | -0.03997300 |
| C | 4.24540100  | 0.97082800  | -0.30487200 |



|   |             |             |             |
|---|-------------|-------------|-------------|
| O | 0.82390400  | -2.66183300 | 0.32085900  |
| O | 0.37334700  | 2.59833400  | -0.73753800 |
| O | -1.84536300 | 1.14992100  | -0.55920400 |
| O | 3.38423500  | -2.48454300 | 0.37397800  |
| H | 2.46530800  | -2.86486300 | 0.41916000  |
| O | 5.40377300  | 1.67753800  | -0.39598800 |
| C | 5.32960000  | 3.06763500  | -0.68611800 |
| H | 6.36099200  | 3.41917700  | -0.71824100 |
| H | 4.85150800  | 3.24992900  | -1.65544500 |
| H | 4.78336300  | 3.61092500  | 0.09351500  |
| C | 5.75674400  | -1.01621100 | 0.14673700  |
| H | 6.47311400  | -0.50408500 | -0.50087600 |
| H | 5.71039400  | -2.06356800 | -0.16144400 |
| C | 6.23197900  | -0.93256200 | 1.60722900  |
| H | 6.29791000  | 0.10968500  | 1.93274800  |
| H | 5.53589400  | -1.45652000 | 2.26832200  |
| H | 7.22020900  | -1.38944900 | 1.72043000  |
| H | -3.23707000 | 0.50584900  | -2.67613100 |
| H | -3.88616500 | -1.25490800 | 0.61608300  |

-----  
10b#

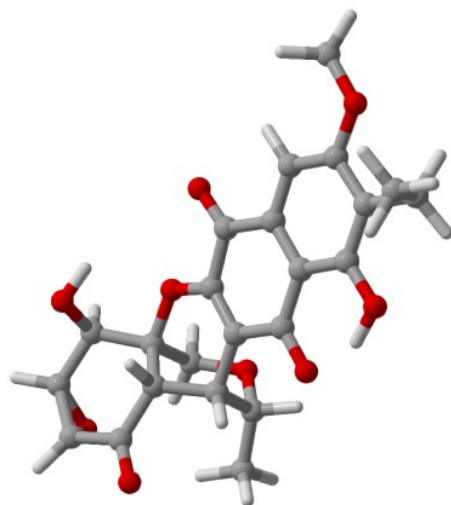

|   |             |             |             |
|---|-------------|-------------|-------------|
| C | -5.05634400 | 1.43262800  | 0.72541000  |
| C | -3.72426900 | 1.96867200  | 0.23856000  |
| C | -2.79526400 | 0.85661700  | -0.28924400 |
| C | -2.69519100 | -0.31949500 | 0.68460900  |
| C | -4.01293300 | -0.88756900 | 1.18606000  |
| C | -5.19233100 | 0.04945500  | 1.21846400  |
| H | -4.17303200 | 0.03945100  | -1.73001400 |
| C | -3.13659900 | 0.39012500  | -1.71142000 |
| C | -1.69707800 | -1.31859700 | 0.08468200  |
| C | -2.12113900 | -1.75178100 | -1.34546100 |
| H | -1.59548000 | -2.20277700 | 0.71553600  |
| O | -4.09783800 | -2.00494200 | 1.65513300  |

|   |             |             |             |
|---|-------------|-------------|-------------|
| O | -5.69115100 | 0.44457400  | -0.08266300 |
| O | -3.14561300 | 2.60886700  | 1.36086700  |
| H | -2.25997100 | 2.88954200  | 1.08227000  |
| H | -3.90402000 | 2.68746500  | -0.57691600 |
| H | -5.71886000 | 2.19052200  | 1.14081400  |
| H | -5.96339100 | -0.21374400 | 1.93908800  |
| O | -2.22859200 | -0.59116900 | -2.18053300 |
| C | -3.36913100 | -2.62837500 | -1.41759300 |
| H | -4.27432600 | -2.10605200 | -1.10160200 |
| H | -3.51573400 | -2.95827200 | -2.44927500 |
| H | -3.25679000 | -3.50565700 | -0.77577600 |
| H | -1.28083800 | -2.30813500 | -1.76971500 |
| C | -0.38424700 | 0.75731200  | -0.20572900 |
| C | 0.86894700  | 1.57207700  | -0.22171600 |
| C | 2.14402000  | 0.81581000  | -0.15295700 |
| C | 2.13419400  | -0.58623200 | -0.01048800 |
| C | 0.87536600  | -1.32261100 | 0.07631200  |
| C | -0.38713400 | -0.58325300 | 0.00328400  |
| H | 3.28960300  | 2.59522400  | -0.32215900 |
| C | 3.33701400  | 1.51956600  | -0.22206500 |
| C | 3.37080100  | -1.27328500 | 0.05253200  |
| C | 4.59270900  | -0.57733700 | -0.03424900 |
| C | 4.55401400  | 0.81921500  | -0.15556500 |
| O | 0.85055400  | -2.56754500 | 0.20110100  |
| O | 0.81348900  | 2.79366500  | -0.27335100 |
| O | -1.49294300 | 1.51107500  | -0.34772800 |
| O | 3.41759700  | -2.60449800 | 0.19817500  |
| H | 2.47225400  | -2.91421900 | 0.22891300  |
| O | 5.76515400  | 1.43373000  | -0.20354400 |
| C | 5.80504400  | 2.84797000  | -0.35113300 |
| H | 6.86195200  | 3.11351300  | -0.37438100 |
| H | 5.32790900  | 3.16668800  | -1.28494100 |
| H | 5.32095100  | 3.35225100  | 0.49302600  |
| C | 5.89885100  | -1.32143500 | 0.05406200  |
| H | 6.64553700  | -0.80372100 | -0.55344200 |
| H | 5.75983900  | -2.32272300 | -0.36076200 |
| C | 6.40164400  | -1.43270500 | 1.50358500  |
| H | 6.56011500  | -0.44006900 | 1.93501600  |
| H | 5.67478400  | -1.96592000 | 2.12280600  |
| H | 7.34959400  | -1.97826800 | 1.54365000  |
| H | -3.04180000 | 1.23923900  | -2.39310700 |
| H | -2.26922000 | 0.09497700  | 1.61168100  |

---

## Reference

- (1) Han, W. B.; Wang, G. Y.; Tang, J. J.; Wang, W. J.; Liu, H.; Gil, R. R.; Navarro-Vázquez, A.; Lei, X.; Gao, J. M. Herpotrichones A and B, Two Intermolecular [4 + 2] Adducts with Anti-Neuroinflammatory Activity from a *Herpotrichia* Species. *Org. Lett.* **2020**, *22*, 405–409.
- (2) Pracht, P.; Bohle, F.; Grimme, S. Automated Exploration of the Low-Energy Chemical Sspace with Fast Quantum Chemical Methods. *Phys. Chem. Chem. Phys.* **2020**, *22*, 7169–7192.
- (3) Grimme, S. Exploration of Chemical Compound, Conformer, and Reaction Space with Meta-Dynamics Simulations Based on Tight-Binding Quantum Chemical Calculations. *J. Chem. Theor. Comput.* **2019**, *15*, 2847–2862.
- (4) Frisch, M. J.; Trucks, G. W.; Schlegel, H. B.; Scuseria, G. E.; Robb, M. A.; Cheeseman, J. R.; Scalmani, G.; Barone, V.; Petersson, G. A.; Nakatsuji, H.; Li, X.; Caricato, M.; Marenich, A. V.; Bloino, J.; Janesko, B. G.; Gomperts, R.; Mennucci, B.; Hratchian, H. P.; Ortiz, J. V.; Izmaylov, A. F.; Sonnenberg, J. L.; Williams; Ding, F.; Lipparini, F.; Egidi, F.; Goings, J.; Peng, B.; Petrone, A.; Henderson, T.; Ranasinghe, D.; Zakrzewski, V. G.; Gao, J.; Rega, N.; Zheng, G.; Liang, W.; Hada, M.; Ehara, M.; Toyota, K.; Fukuda, R.; Hasegawa, J.; Ishida, M.; Nakajima, T.; Honda, Y.; Kitao, O.; Nakai, H.; Vreven, T.; Throssell, K.; Montgomery Jr., J. A.; Peralta, J. E.; Ogliaro, F.; Bearpark, M. J.; Heyd, J. J.; Brothers, E. N.; Kudin, K. N.; Staroverov, V. N.; Keith, T. A.; Kobayashi, R.; Normand, J.; Raghavachari, K.; Rendell, A. P.; Burant, J. C.; Iyengar, S. S.; Tomasi, J.; Cossi, M.; Millam, J. M.; Klene, M.; Adamo, C.; Cammi, R.; Ochterski, J. W.; Martin, R. L.; Morokuma, K.; Farkas, O.; Foresman, J. B.; Fox, D. J. *Gaussian 16 Rev. C.01*: Wallingford, CT, **2016**.
- (5) Willoughby, P. H.; Jansma, M. J.; Hoye, T. R. A Guide to Small-Molecule Structure Assignment through Computation of (<sup>1</sup>H and <sup>13</sup>C) NMR Chemical Shifts. *Nat. Proto.* **2014**, *9*, 643–660.
- (6) Grimblat, N.; Zanardi, M. M.; Sarotti, A. M. Beyond DP4: an Improved Probability for the Stereochemical Assignment of Isomeric Compounds using Quantum Chemical Calculations of NMR Shifts. *J. Org. Chem.* **2015**, *80*, 12526–12534.
- (7) Pescitelli, G.; Bruhn, T. Good Computational Practice in the Assignment of Absolute Configurations by TDDFT Calculations of ECD Spectra. *Chirality* **2016**, *28*, 466–474.
- (8) Lu, T.; Chen, F., Multiwfn: a Multifunctional Wavefunction Analyzer. *J. Comput. Chem.* **2012**, *33*, 580–592.

(9) Tang, D.; Liu, L. L.; He, Q. R.; Yan, W.; Li, D.; Gao, J. M. Ansamycins with Antiproliferative and Antineuroinflammatory Activity from Moss-Soil-Derived *Streptomyces cacaoi* subsp. *asoensis* H2S5 *J. Nat. Prod.* **2018**, *81*, 1984–1991.
